# Supplementary material for: Copper(i)-carbenes as key intermediates in the [3 + 2]-cyclization of pyridine derivatives with alkenyldiazoacetates: a computational study
Source: Royal Society of Chemistry journal article supplement (doi:10.1039/c8ob02676a), 2018-12-14
Supplement: c8ob02676a1.pdf [file c8ob02676a1.pdf]

## Copper (I)-carbenes as key intermediates in the [3+2]-cyclization of pyridine derivatives with alkenyldiazoacetates: A computational study

### ELECTRONIC SUPPLEMENTARY INFORMATION

---

#### CONTENTS <sup>#</sup>

---

|                                                                                                                                                                                                                                                                                           |            |
|-------------------------------------------------------------------------------------------------------------------------------------------------------------------------------------------------------------------------------------------------------------------------------------------|------------|
| <b>I.-</b> Stationary points of the potential-energy surface corresponding to the direct addition reaction of diazocompound <b>2a</b> to CuBr-activated pyridine derivatives <b>1a-c</b>                                                                                                  | <b>S2</b>  |
| <b>II.-</b> Cartesian coordinates and Gibbs free energies of the stationary points located on the potential-energy surface for formation of copper(I) carbene intermediate <b>VII</b> via N <sub>2</sub> -extrusion from complex <b>Va</b> .                                              | <b>S8</b>  |
| <b>III.-</b> Potential-energy Surface for Formation of Copper(I) carbene Intermediate <b>VII</b> via N <sub>2</sub> -extrusion from Complex <b>Va</b> at Becke3LYP/6-311+G(d) and MP2/6-311+G(d) Levels of theory.                                                                        | <b>S10</b> |
| <b>IV.-</b> Cartesian coordinates and Gibbs free energies of the stationary points for conjugate addition of pyridine ( <b>1a</b> ) to carbene intermediate <b>VII</b> , intramolecular cyclization, reductive elimination, and aromatization steps.                                      | <b>S14</b> |
| <b>V.-</b> Cartesian coordinates and Gibbs free energies of the stationary points for conjugate addition of 3-methylpyridine ( <b>1b</b> ) to carbene intermediate <b>VII</b> , intramolecular cyclization and reductive elimination steps.                                               | <b>S17</b> |
| <b>VI.-</b> Cartesian coordinates and Gibbs free energies of the stationary points for conjugate addition of 3-nitropyridine ( <b>1c</b> ) to carbene intermediate <b>VII</b> , intramolecular cyclization and reductive elimination steps.                                               | <b>S20</b> |
| <b>VII.-</b> Cartesian coordinates and Gibbs free energies of the stationary points for conjugate addition of 3-methoxycarbonylpyridine ( <b>1d</b> ) and 3-fluoropyridine ( <b>1e</b> ) to carbene intermediate <b>VII</b> , intramolecular cyclization and reductive elimination steps. | <b>S23</b> |

---

<sup>#</sup> Through all this document, *G* (in hartrees) corresponds to the sum of electronic and thermal Gibbs free-energies and *V<sub>i</sub>* is the imaginary harmonic frequency of transition states.

**I.- Stationary points of the potential-energy surface corresponding to the direct addition reaction of diazocompound **2a** to CuBr-activated pyridine derivatives **1b-c**.**

The potential-energy surface corresponding to the direct addition reaction of diazocompound **2a** to the complex formed by pyridine **1a** and CuBr and the was studied and several stationary points were located (see Scheme S1).

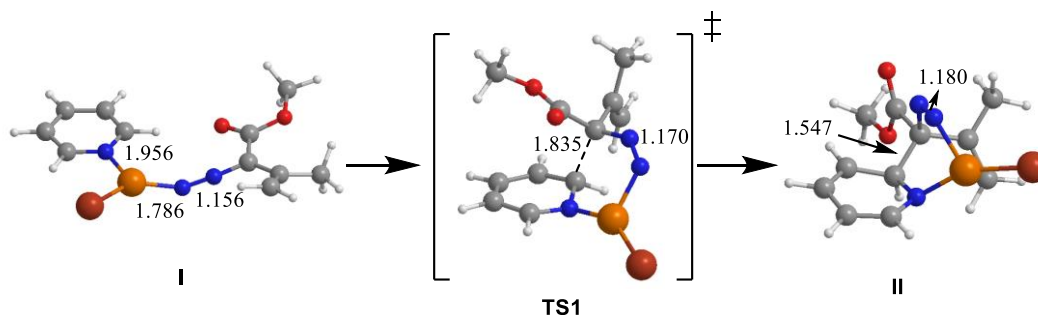

**Scheme S1.** Stationary points corresponding to the first step of the reaction of **1a** with **2a** in presence of CuBr. Lengths are in Å.

Pyridine derivative **1a**, CuBr and **2a** form a complex **I**, which undergoes an intramolecular *ortho*-addition of the nucleophilic carbon atom of diazocompound moiety to the electrophilic carbon atom adjacent to the nitrogen of pyridine ring, *via* transition structure **TS1**, leading to bicyclic intermediate **II**. The imaginary normal mode corresponding to **TS1** is associated to the process of bond forming between the diazo carbon atom of **2a** to the C-2 of the pyridine ring. Intermediate **II** is predicted to undergo extrusion of the dinitrogen molecule through the transition structure **TS2**, leading to the metallacycle intermediate **III** (Scheme S2).

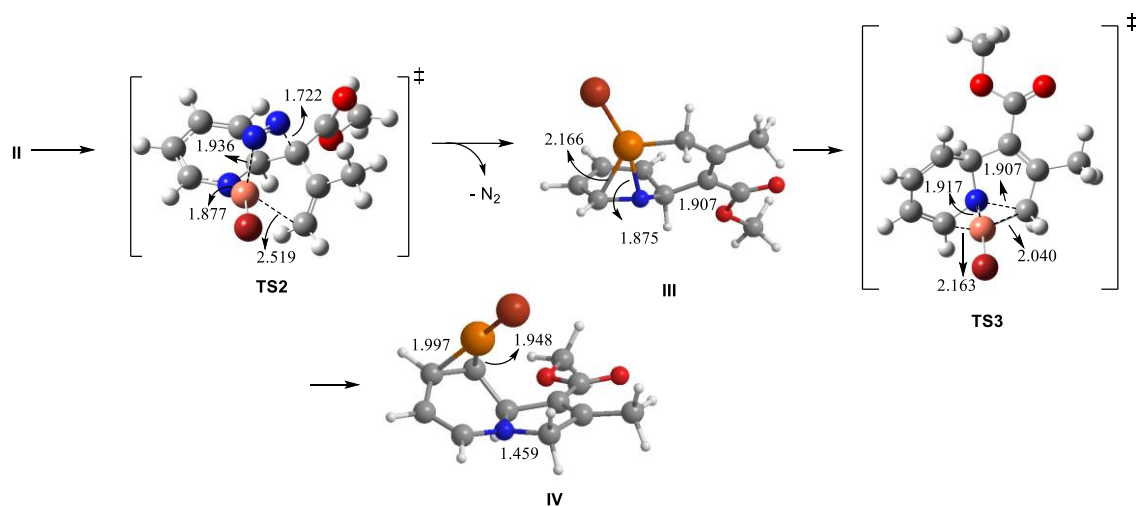

**Scheme S2.** Stationary points corresponding to the extrusion of dinitrogen and reductive elimination to form the  $\eta^2$ -CuBr coordinated to the indolizine structure, **IV**. Lengths are in Å.

The imaginary normal mode corresponding to **TS1** is associated to the bond forming between the diazo carbon atom of **2a** to the C-2 of the pyridine ring.

Finally, reductive elimination of CuBr from metallacycle **III**, with a simultaneous formation of the carbon-carbon bond, *via* the transition structure **TS3**, leads to the indolizine derivative **IV**, in which the CuBr moiety is  $\eta^2$ -coordinated to the pyridine ring.

According to the experimental evidence, the reaction of diazocompound **2a** with 3-substituted pyridines, as **1b** and **1c**, is regioselective. In the case of the reaction of 3-nitropyridine (**1c**), only the regioisomer corresponding to the addition to the C3 position of pyridine ring, **3b- $\alpha$** , is formed; in the case of the reaction of **1b**, a 1:7 mixture of regioisomers was obtained (see Scheme S3). In the case of the reaction of 3-nitropyridine **1b**, two transition structures for the direct addition step, **TS2b- $\alpha$**  and **TS2b- $\beta$** , were found,

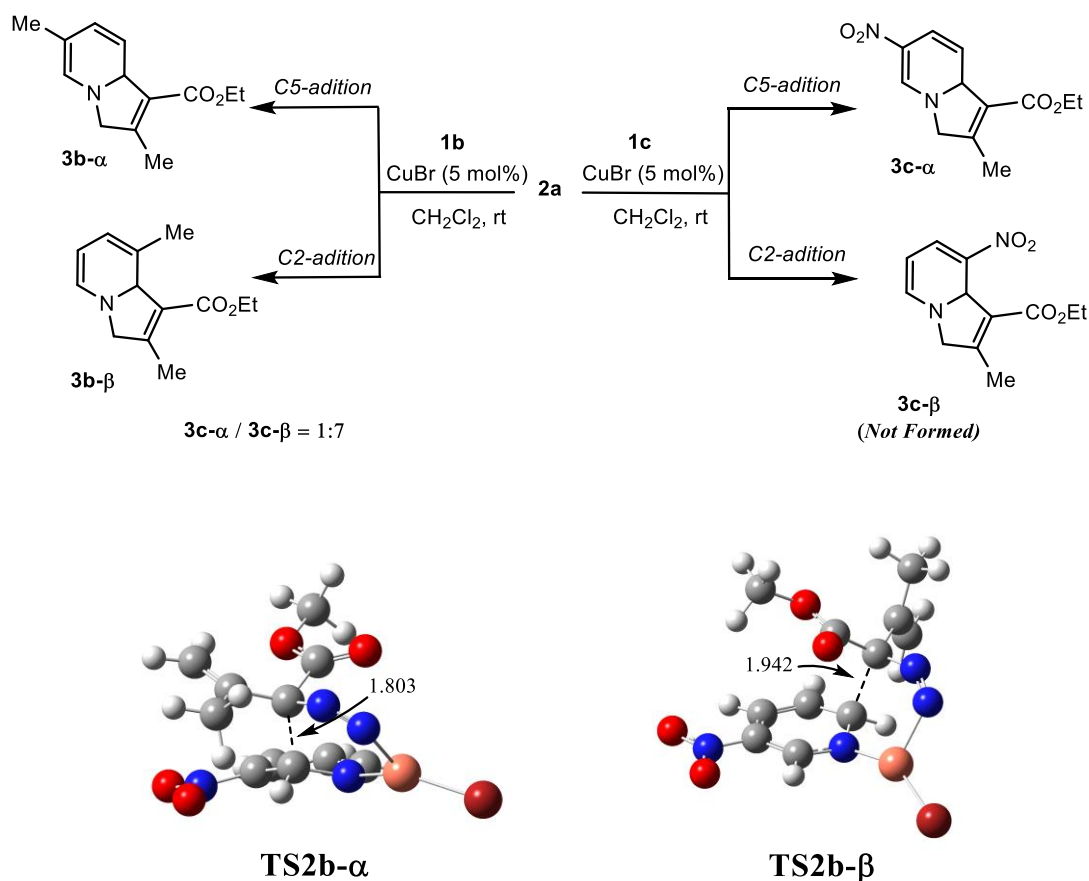

**Scheme S3:** Reaction of **2a** with **1b** and **1c**. The Transition Structures corresponding to the addition to the position 2 and 5 of **1b**, **TS2b- $\alpha$**  and **TS2b- $\beta$** , respectively, are shown.

The difference in the Gibbs free energy of activation is predicted to be very small:  $\Delta\Delta G^\ddagger$  (**TS2b- $\alpha$**  - **TS2b- $\beta$** ) = 0.23 kcal mol<sup>-1</sup>. This result is in clear disagreement with the

complete regioselectivity observed in this reaction. On the other hand, in the case of the reaction of 3-methylpyridine, only the transition structure corresponding to the addition to the C5 position of pyridine ring was located, after an extensive search.

According to these results, the mechanism of the direct addition of diazocompounds to the CuBr-activated pyridine was ruled out.

*Stationary points located at Becke3LYP/6-31G(d) level of theory.*

|                                                                                                                                                                                                                                                                                                                                                                                                                                                                                                                                                                                             |                                                                                                                                                                                                                                                                                                                                                                                                                                                                                                                                                                                                                                                                                                                                                                                                                                                                                                                                       |
|---------------------------------------------------------------------------------------------------------------------------------------------------------------------------------------------------------------------------------------------------------------------------------------------------------------------------------------------------------------------------------------------------------------------------------------------------------------------------------------------------------------------------------------------------------------------------------------------|---------------------------------------------------------------------------------------------------------------------------------------------------------------------------------------------------------------------------------------------------------------------------------------------------------------------------------------------------------------------------------------------------------------------------------------------------------------------------------------------------------------------------------------------------------------------------------------------------------------------------------------------------------------------------------------------------------------------------------------------------------------------------------------------------------------------------------------------------------------------------------------------------------------------------------------|
| <p><b>CuBr</b></p> <p>Cu -1.1171410201, 0.1921897991, -0.1653679279<br/>Br 0.925631131, -0.1592429764, 0.1370191402</p> <p>G = -4212.005922</p>                                                                                                                                                                                                                                                                                                                                                                                                                                             | <p><b>N<sub>2</sub></b></p> <p>N, 0, 0.0, 0.0, -0.5527503374<br/>N, 0, 0.0, 0.0, 0.5527503374</p> <p>G = -109.536980</p>                                                                                                                                                                                                                                                                                                                                                                                                                                                                                                                                                                                                                                                                                                                                                                                                              |
| <p><b>Ia</b></p> <p>N,0,-1.1958133585,0.728334289,0.242386975<br/>C,0,-0.4483100011,0.2570107047,1.2485173343<br/>C,0,0.7335381231,-0.4636167059,1.0661560391<br/>C,0,1.1660842366,-0.7101946274,-0.2363792647<br/>C,0,0.3992329534,-0.2263436122,-1.2957608349<br/>C,0,-0.7668572522,0.4830812823,-1.002181534<br/>H,0,-0.8140577958,0.4669378726,2.2526855908<br/>H,0,1.2961645242,-0.8196547008,1.924310764<br/>H,0,2.080752103,-1.2672562125,-0.4218007743<br/>H,0,0.6942315592,-0.3925697807,-2.3278033836<br/>H,0,-1.3885252396,0.8745805491,-1.8062114619</p> <p>G = -248.223338</p> | <p><b>Ib</b></p> <p>C,0,0.7575361617,-0.477551385,-0.0001441555<br/>C,0,0.7435621838,0.9228897106,0.0009050408<br/>C,0,-0.4872053728,-1.1185100383,-0.0010326266<br/>C,0,-1.651991466,-0.355858954,-0.0008044594<br/>C,0,-1.5377273732,1.0357710976,0.0003041155<br/>N,0,-0.3632804954,1.6753495588,0.0011447845<br/>H,0,-0.5408349258,-2.2054148238,-0.0019006965<br/>H,0,-2.6308713779,-0.8269118617,-0.0014822484<br/>C,0,2.0537430958,-1.2498762818,-0.0002318052<br/>H,0,1.6876418979,1.4684553995,0.0015919758<br/>H,0,-2.4272930848,1.6638988283,0.0005154102<br/>H,0,2.1352893188,-1.8963820156,-0.8826872357<br/>H,0,2.1353626256,-1.8963698829,0.8822324913<br/>H,0,2.9161656388,-0.5759074504,-0.0002598459</p> <p>G = -287.517391</p>                                                                                                                                                                                     |
| <p><b>Ic</b></p> <p>N,0,-0.0043398519,-0.0015655737,0.<br/>C,0,0.0051216776,1.3383243477,0.<br/>C,0,1.1695674633,2.1115337394,0.<br/>C,0,2.3997399567,1.4618610787,0.<br/>C,0,2.3842947646,0.0701837634,0.<br/>C,0,1.1755348827,-0.6275891275,0.<br/>N,0,3.6535928244,-0.6711182088,0.<br/>O,0,4.6939415343,-0.0145648305,0.<br/>O,0,3.5944820865,-1.8991189935,0.<br/>H,0,-0.9711069111,1.8194594907,0.<br/>H,0,1.1108689121,3.1951327581,0.<br/>H,0,3.343574111,1.993996511,0.<br/>H,0,1.1725905495,-1.7129029551,0.</p> <p>G = -452.722900</p>                                           | <p><b>2a</b></p> <p>C,0,2.2085985366,1.7170801886,0.153671731<br/>C,0,0.5702046274,-0.1051565382,-0.0894811695<br/>C,0,-0.7310442732,-0.767705965,0.0989842313<br/>C,0,-0.1142407007,2.3373741251,-0.4770216767<br/>N,0,2.391538415,-1.7288302786,-0.3699471128<br/>N,0,1.5427841097,-0.9866071657,-0.236454577<br/>C,0,0.948678487,1.3284738277,-0.1040482335<br/>O,0,-0.8909604338,-1.974295523,0.0523786562<br/>O,0,-1.7292759732,0.112756022,0.337581657<br/>C,0,-3.0249154831,-0.4821240579,0.521602927<br/>H,0,2.491458358,2.7615902556,0.0754702968<br/>H,0,2.9939073781,1.0247870925,0.4439547378<br/>H,0,-3.0210846813,-1.149038658,1.3874780055<br/>H,0,-3.3166687887,-1.0516450591,-0.3644294453<br/>H,0,-3.7055362536,0.354230603,0.6834433654<br/>H,0,0.3418347931,3.323553958,-0.6005976321<br/>H,0,-0.8903427482,2.4049067161,0.2900476045<br/>H,0,-0.6156216374,2.0643437277,-1.4124844671</p> <p>G = -493.237917</p> |

|                                                                                                                                                                                                                                                                                                                                                                                                                                                                                                                                                                                                                                                                                                                                                                                                                                                                                                                                                                                                                                                                                                                                                                                                                                                                                                                                                                                                                                                                                                                                                                                                                             |                                                                                                                                                                                                                                                                                                                                                                                                                                                                                                                                                                                                                                                                                                                                                                                                                                                                                                                                                                                                                                                                                                                                                                                                                                                                                                                                                                                                                                                                                                                                                                                                                                                    |
|-----------------------------------------------------------------------------------------------------------------------------------------------------------------------------------------------------------------------------------------------------------------------------------------------------------------------------------------------------------------------------------------------------------------------------------------------------------------------------------------------------------------------------------------------------------------------------------------------------------------------------------------------------------------------------------------------------------------------------------------------------------------------------------------------------------------------------------------------------------------------------------------------------------------------------------------------------------------------------------------------------------------------------------------------------------------------------------------------------------------------------------------------------------------------------------------------------------------------------------------------------------------------------------------------------------------------------------------------------------------------------------------------------------------------------------------------------------------------------------------------------------------------------------------------------------------------------------------------------------------------------|----------------------------------------------------------------------------------------------------------------------------------------------------------------------------------------------------------------------------------------------------------------------------------------------------------------------------------------------------------------------------------------------------------------------------------------------------------------------------------------------------------------------------------------------------------------------------------------------------------------------------------------------------------------------------------------------------------------------------------------------------------------------------------------------------------------------------------------------------------------------------------------------------------------------------------------------------------------------------------------------------------------------------------------------------------------------------------------------------------------------------------------------------------------------------------------------------------------------------------------------------------------------------------------------------------------------------------------------------------------------------------------------------------------------------------------------------------------------------------------------------------------------------------------------------------------------------------------------------------------------------------------------------|
| <p><b>I</b></p> <p>N,0,-0.6029721487,-2.027297389,-0.7610963225<br/> C,0,1.8713776718,3.8270560476,1.1216108664<br/> C,0,-1.507615139,-1.9675429334,0.2387628907<br/> C,0,-2.3447562857,-3.0351583041,0.5465006357<br/> C,0,-2.2525143718,-4.2065184085,-0.2041080202<br/> C,0,-1.3185172614,-4.2683368794,-1.2377152415<br/> C,0,-0.5134561554,-3.1622764651,-1.484136211<br/> H,0,-1.5508047459,-1.0395590406,0.8014798286<br/> H,0,-3.0540458155,-2.9386002016,1.3619099897<br/> H,0,-2.8950134174,-5.0552458435,0.0130943358<br/> H,0,-1.207899243,-5.1586048407,-1.8481764902<br/> H,0,0.2410310933,-3.1529223532,-2.2655457097<br/> C,0,-0.1112491092,2.4476785938,1.5430442713<br/> Cu,0,0.5565321311,-0.5266405283,-1.2400909639<br/> Br,0,2.109334889,-1.1159880309,-2.7907278289<br/> C,0,-1.0915052741,1.820704345,2.4499662713<br/> C,0,0.0620782085,4.8347353047,2.5016246234<br/> N,0,0.1465371613,1.0137238505,-0.4403676405<br/> N,0,0.091496883,1.7262800821,0.4684304798<br/> C,0,0.6726522572,3.6985220709,1.7125348735<br/> O,0,-1.682015501,0.7772492492,2.2089293016<br/> O,0,-1.2673597441,2.5184230489,3.5907727585<br/> C,0,-2.2147481771,1.9554647651,4.5136914271<br/> H,0,2.4198133439,4.7621459259,1.1753120099<br/> H,0,2.3403014173,3.0201003346,0.565325173<br/> H,0,-1.8927330411,0.9614765127,4.8343700529<br/> H,0,-3.202693401,1.8799736058,4.0522996091<br/> H,0,-2.2366583213,2.6433403654,5.3591836595<br/> H,0,0.6705423931,5.7357348068,2.3831969774<br/> H,0,-0.0031000014,4.5972472925,3.5669664987<br/> H,0,-0.9563826687,5.0567768274,2.1616556096</p> <p>G = -4953.566325</p> | <p><b>II</b></p> <p>N,0,0.7840073797,-1.2912566646,-0.4671677427<br/> C,0,-0.550704969,0.9887705221,-1.9121721895<br/> C,0,-0.655435594,-1.5008960628,-0.2922851919<br/> C,0,-1.0247391624,-2.6762896803,0.5725614335<br/> C,0,-0.1139843466,-3.6271989097,0.8743565562<br/> C,0,1.2507550472,-3.4856504057,0.4538905988<br/> C,0,1.6309996724,-2.3109998545,-0.1340934638<br/> H,0,-1.1043601367,-1.6334602214,-1.2932065766<br/> H,0,-2.0514112675,-2.7637471883,0.9139757781<br/> H,0,-0.4074753856,-4.4950771054,1.4591287441<br/> H,0,1.9768848266,-4.2708839361,0.6295966855<br/> H,0,2.6726008022,-2.1310548523,-0.3918534553<br/> C,0,-1.3508570842,-0.1666771065,0.1688779068<br/> Cu,0,1.4721484018,0.3952968261,-0.0629612903<br/> Br,0,2.7786338278,2.1846504509,-0.345934979<br/> C,0,-2.8398084749,-0.3750089509,0.4809143367<br/> C,0,-1.7566393434,2.3452081012,-0.2033005712<br/> N,0,0.513726426,0.3243082293,1.5702659223<br/> N,0,-0.6553855584,0.1723321517,1.5293998906<br/> C,0,-1.1930876584,1.0478910377,-0.7368286991<br/> O,0,-3.3936362569,-0.0568815665,1.5040379891<br/> O,0,-3.4516358738,-0.9348363766,-0.5803774971<br/> C,0,-4.8694031899,-1.1568452599,-0.4310440031<br/> H,0,-0.4375117227,1.8864413703,-2.5130268865<br/> H,0,-0.1479884104,0.0745804739,-2.330883005<br/> H,0,-5.3818402278,-0.2117183467,-0.2376308167<br/> H,0,-5.0612002719,-1.8455962801,0.3953430725<br/> H,0,-5.1947360493,-1.5880044598,-1.3772169485<br/> H,0,-1.5883670786,3.1538408308,-0.9184318343<br/> H,0,-1.282794339,2.6274555033,0.7442233897<br/> H,0,-2.8331184315,2.2730874186,-0.0084471694</p> <p>G = -4953.497209</p> |
| <p><b>III</b></p> <p>N,0,0.7273856111,-1.1998680986,-0.5692584333<br/> C,0,0.7440988713,1.4119675136,-0.7480762272<br/> C,0,-0.7371681303,-1.1956758178,-0.6390989991<br/> C,0,-1.4163756856,-1.3531007622,0.7064621599<br/> C,0,-0.7762936575,-1.9709294668,1.7256348223<br/> C,0,0.5880808059,-2.397154607,1.545296345<br/> C,0,1.2811610466,-1.9949873899,0.4248128498<br/> H,0,-1.0115947125,-2.0776056224,-1.2419553923<br/> H,0,-2.4383664614,-1.0028145337,0.8122585146<br/> H,0,-1.2611117682,-2.1248634986,2.6852454481<br/> H,0,1.0816118687,-3.0011132635,2.300214363<br/> H,0,2.3281113939,-2.259629923,0.2902396219<br/> C,0,-1.2441904277,0.019019496,-1.413686578<br/> Cu,0,1.2913572179,0.1645610777,0.5870613914<br/> Br,0,2.4129332155,1.29703738,2.1622289555<br/> C,0,-2.5478825087,-0.125867056,-2.1073767302<br/> C,0,-1.0500946971,2.4261108665,-2.1718311727<br/> C,0,-0.5627406274,1.1914380594,-1.4315539514<br/> O,0,-3.0919678612,0.6984631957,-2.8189795773<br/> O,0,-3.1215427009,-1.33516544,-1.8457794664<br/> C,0,-4.3902184437,-1.5599116547,-2.4787441493<br/> H,0,0.7651279098,2.389816457,-0.2587537389<br/> H,0,1.5759320602,1.3642675284,-1.462246578<br/> H,0,-4.2917239614,-1.5070425284,-3.5661138902<br/> H,0,-5.1207322385,-0.8142528508,-2.1538782572<br/> H,0,-4.6972352063,-2.5594802222,-2.1690879679<br/> H,0,-0.3553834495,3.2588023491,-2.0321653466<br/> H,0,-2.0445622611,2.7305657376,-1.8326256298<br/> H,0,-1.145969091,2.2220103764,-3.24207377</p> <p>G = -4843.961726</p>                                                                                        | <p><b>IV</b></p> <p>N,0,0.4258272478,-1.7900746811,-0.1198619781<br/> C,0,-0.9805515577,-2.0073592765,-0.4428159347<br/> C,0,0.6162064756,-0.9777494454,1.1016004099<br/> C,0,1.4952240326,0.2122086992,0.7512465062<br/> C,0,2.5673433158,-0.0505047906,-0.1150386001<br/> C,0,2.6226551551,-1.2933279829,-0.8684075253<br/> C,0,1.4812414481,-2.042823109,-0.9448521321<br/> H,0,1.1315767988,-1.5808580646,1.8720660796<br/> H,0,1.5452217803,1.0343514145,1.4579910008<br/> H,0,3.4245194101,0.6194563604,-0.1382784989<br/> H,0,3.4789602883,-1.5275539315,-1.4883025787<br/> H,0,1.3532787219,-2.846821134,-1.6653707552<br/> C,0,-0.8201618256,-0.7074442759,1.5105096174<br/> Cu,0,1.0000949626,0.7587466827,-1.0519745151<br/> Br,0,-0.4009887798,1.2300398855,-2.691819971<br/> C,0,-1.1659471704,0.0406843189,2.7363167539<br/> C,0,-3.1964437393,-1.2602953881,0.6855769065<br/> C,0,-1.7026919519,-1.2760744123,0.6625985776<br/> O,0,-2.2838317316,0.3049007878,3.1356394017<br/> O,0,-0.0431808419,0.406632209,3.408668053<br/> C,0,-0.2686118455,1.1305463583,4.6297830007<br/> H,0,-1.2367582061,-1.5877447233,-1.4267449403<br/> H,0,-1.2438997615,-3.0778213078,-0.4498671433<br/> H,0,-0.8524264829,0.5274973382,5.3299475023<br/> H,0,-0.8056421742,2.061284637,4.4296751392<br/> H,0,0.7229809263,1.336688643,5.0334216436<br/> H,0,-3.590717196,-2.2839062743,0.6342237115<br/> H,0,-3.5727952738,-0.7320017428,-0.2007719811<br/> H,0,-3.5767096214,-0.7665263854,1.5784394727</p> <p>G = -4844.070045</p>                                                                                                                 |

| <i>TS1</i>                                                                                                                                                                                                                                                                                                                                                                                                                                                                                                                                                                                                                                                                                                                                                                                                                                                                                                                                                                                                                                                                                                                                                                                                                                                                                                                                                                                                                                                                                                                                                                                                                                                                 | <i>TS2</i>                                                                                                                                                                                                                                                                                                                                                                                                                                                                                                                                                                                                                                                                                                                                                                                                                                                                                                                                                                                                                                                                                                                                                                                                                                                                                                                                                                                                                                                                                                                                                                                                                                                                           |
|----------------------------------------------------------------------------------------------------------------------------------------------------------------------------------------------------------------------------------------------------------------------------------------------------------------------------------------------------------------------------------------------------------------------------------------------------------------------------------------------------------------------------------------------------------------------------------------------------------------------------------------------------------------------------------------------------------------------------------------------------------------------------------------------------------------------------------------------------------------------------------------------------------------------------------------------------------------------------------------------------------------------------------------------------------------------------------------------------------------------------------------------------------------------------------------------------------------------------------------------------------------------------------------------------------------------------------------------------------------------------------------------------------------------------------------------------------------------------------------------------------------------------------------------------------------------------------------------------------------------------------------------------------------------------|--------------------------------------------------------------------------------------------------------------------------------------------------------------------------------------------------------------------------------------------------------------------------------------------------------------------------------------------------------------------------------------------------------------------------------------------------------------------------------------------------------------------------------------------------------------------------------------------------------------------------------------------------------------------------------------------------------------------------------------------------------------------------------------------------------------------------------------------------------------------------------------------------------------------------------------------------------------------------------------------------------------------------------------------------------------------------------------------------------------------------------------------------------------------------------------------------------------------------------------------------------------------------------------------------------------------------------------------------------------------------------------------------------------------------------------------------------------------------------------------------------------------------------------------------------------------------------------------------------------------------------------------------------------------------------------|
| <p>N,0,-0.5092873667,-0.8202210519,-0.7946339309<br/> C,0,-1.8173157,3.3901822543,-0.7883028462<br/> C,0,-1.2633806888,0.3745780387,-0.8434973465<br/> C,0,-2.7206621176,0.2125456733,-0.7223736726<br/> C,0,-3.2471065527,-0.9476768717,-0.2416493439<br/> C,0,-2.3936167826,-2.0396376273,0.0853061107<br/> C,0,-1.0578633415,-1.9195010053,-0.2118134981<br/> H,0,-0.9288897124,0.9973584634,-1.6770398652<br/> H,0,-3.3545611665,1.0594471607,-0.9565309276<br/> H,0,-4.3241200717,-1.05095955,-0.1362238459<br/> H,0,-2.7892495938,-2.9805917444,0.4498730221<br/> H,0,-0.3863140126,-2.7672606118,-0.1038473123<br/> C,0,-0.7278747945,1.5180148656,0.488300286<br/> Cu,0,1.5685014551,-0.7924325588,-0.8303478328<br/> Br,0,3.2135982018,-1.86070912,-1.4301983672<br/> C,0,-1.0748379395,0.8251127482,1.8068414917<br/> C,0,-0.9472475514,3.8791018757,1.4869203199<br/> N,0,1.5685014551,0.855698354,0.0335296143<br/> N,0,0.7187463087,1.551203529,0.437116371<br/> C,0,-1.232431424,2.9493892129,0.3294447771<br/> O,0,-0.347820658,0.033764003,2.3652774247<br/> O,0,-2.3117403066,1.1503356966,2.2108322379<br/> C,0,-2.7924259149,0.4194374545,3.3580535033<br/> H,0,-2.1279676435,4.4281115091,-0.8682800435<br/> H,0,-2.0167374574,2.7711733751,-1.6545479387<br/> H,0,-2.1368303962,0.5856106968,4.2158294941<br/> H,0,-2.8290530551,-0.648312025,3.1297969934<br/> H,0,-3.7910769597,0.8107316235,3.5503817768<br/> H,0,-1.2670397618,4.8992104493,1.25558231<br/> H,0,0.1261958346,3.8982452426,1.7128936546<br/> H,0,-1.4665863898,3.5537556889,2.3948023164</p> <p><math>\nu_i = -308.5 \text{ cm}^{-1}</math><br/> <math>G = -4953.492652</math></p> | <p>N,0,0.3205296844,-1.2237899683,-0.968349664<br/> C,0,0.7942163739,1.6370658029,-1.0809654389<br/> C,0,-1.0396421597,-0.6972616261,-1.1356351385<br/> C,0,-2.1352050754,-1.7249475277,-1.0440832725<br/> C,0,-1.855866559,-3.0461972947,-1.0961119664<br/> C,0,-0.4968648922,-3.5001226398,-1.1469268624<br/> C,0,0.5040864382,-2.5741795008,-1.0261478479<br/> H,0,-1.088592038,-0.219012149,-2.1336834988<br/> H,0,-3.160133207,-1.3754353062,-0.9842205093<br/> H,0,-2.6637509698,-3.7730084119,-1.0769984797<br/> H,0,-0.2594713002,-4.5524239292,-1.2522295281<br/> H,0,1.5458200056,-2.8860270969,-0.991204646<br/> C,0,-1.26972485,0.5391397022,-0.215600801<br/> Cu,0,1.4090347875,-0.3758178257,0.3034391627<br/> Br,0,3.3217457989,0.3584232007,1.2103504981<br/> C,0,-2.6961620943,1.0755772257,-0.2023097638<br/> C,0,-0.4552226465,2.764013652,0.7581021679<br/> N,0,-0.033547902,-0.6684924043,-1.5613142506<br/> N,0,-1.0702064806,-0.1870227061,1.3327498206<br/> C,0,-0.2786627463,1.6568567928,-0.2581750764<br/> O,0,-3.2962397236,1.4258220641,0.7846913176<br/> O,0,-3.1795639092,1.1593119561,-1.4592934326<br/> C,0,-4.5111509778,1.7044423817,-1.5722431022<br/> H,0,1.5225958993,2.4406995866,-1.0331777692<br/> H,0,0.914219768,0.9268644643,-1.8895193712<br/> H,0,-4.5385450643,2.7206780173,-1.172267827<br/> H,0,-5.2239143615,1.0835406653,-1.0242993012<br/> H,0,-4.7340627963,1.7015749759,-2.6387325766<br/> H,0,0.4012674178,3.4414168125,0.727936676<br/> H,0,-0.5440985144,2.3671154609,1.7754601775<br/> H,0,-1.364249555,3.3456634128,0.568332186</p> <p><math>\nu_i = -223.1 \text{ cm}^{-1}</math><br/> <math>G = -4953.496124</math></p> |

**TS3**

N,0,0.3795417712,-1.2854694078,-0.6012492181  
C,0,1.0982983381,0.248811409,-1.4208270796  
C,0,-1.068400879,-1.0346160465,-0.5105508967  
C,0,-1.4969342079,-0.921964371,0.9359533432  
C,0,-0.9267356639,-1.7832622973,1.8112570564  
C,0,0.1979993598,-2.6005488588,1.4072591056  
C,0,0.916221074,-2.218796469,0.3044645211  
H,0,-1.5490437995,-1.9231491237,-0.9544803826  
H,0,-2.2727816214,-0.2215340414,1.2254754985  
H,0,-1.2493075338,-1.8181184571,2.8487447109  
H,0,0.5475106598,-3.4175893286,2.0289789558  
H,0,1.8414370313,-2.6999575066,-0.0016492503  
C,0,-1.3244568799,0.150745337,-1.4201308362  
Cu,0,1.3429900797,-0.1151202141,0.5715147271  
Br,0,2.6114149373,1.0257164439,1.999137406  
C,0,-2.717136706,0.5259785507,-1.7698577776  
C,0,-0.1493800184,1.9338224741,-2.8386082591  
C,0,-0.2202610171,0.7625166878,-1.8988371946  
O,0,-3.0719133253,1.4529707022,-2.4729388139  
O,0,-3.5985857665,-0.3254785947,-1.1887218375  
C,0,-4.9844492135,-0.0588005932,-1.4617534439  
H,0,1.7340040208,1.0823051664,-1.0680658394  
H,0,1.6694492204,-0.3050768414,-2.1654158136  
H,0,-5.1836234293,-0.1323167408,-2.533990884  
H,0,-5.256689216,0.9422618228,-1.1178338684  
H,0,-5.5398673976,-0.8199564754,-0.9136105968  
H,0,0.4881581521,1.6890408413,-3.6983438004  
H,0,0.3201090754,2.7890616548,-2.3339629484  
H,0,-1.1369750609,2.2284737575,-3.1877635707

$\nu_i = -414.6 \text{ cm}^{-1}$   
 $G = -4843.999171$

| <i>TS2b-<math>\alpha</math></i>               | <i>TS2b-<math>\beta</math></i>                |
|-----------------------------------------------|-----------------------------------------------|
| N,0,0.3271910147,0.7308279554,0.7493938604    | N,0,-0.3644320843,-0.4115477294,-0.7905323851 |
| C,0,-3.2671744169,-0.8899808992,-2.0237895304 | C,0,-0.3022032881,4.0215571723,-0.8990770637  |
| C,0,-0.6849988595,0.8919849891,-0.2370001648  | C,0,-0.7544275624,0.9324651452,-0.9080900652  |
| C,0,-1.9560479182,1.4088375367,0.2950834473   | C,0,-2.1669185138,1.2330937663,-0.7008452999  |
| C,0,-2.2795555306,1.2790173127,1.6210490398   | C,0,-2.9924370951,0.315197249,-0.1302508943   |
| C,0,-1.3236460033,0.750504166,2.5107514588    | C,0,-2.4658270216,-0.9632080284,0.1979356443  |
| C,0,-0.0420471114,0.5318775792,2.0296004296   | C,0,-1.1692987087,-1.2798730592,-0.1514453711 |
| H,0,-0.3202845833,1.4590026687,-1.092487046   | H,0,-0.274834956,1.4110229745,-1.761655458    |
| N,0,-2.8258994217,2.1390194833,-0.5918677185  | H,0,-2.5303264372,2.2198333197,-0.9609521309  |
| H,0,-3.2391836639,1.6471621178,1.9660610529   | H,0,-4.0409028488,0.5173371009,0.0530440425   |
| H,0,-1.5299555617,0.6622831895,3.5705660006   | N,0,-3.3003090084,-1.9585438249,0.826935073   |
| H,0,0.7655778433,0.2857806091,2.7144663771    | H,0,-0.7945886892,-2.283908086,0.0143062105   |
| C,0,-0.9590847385,-0.6994367107,-1.0388111609 | C,0,0.2447714446,1.9550658633,0.4066783091    |
| Cu,0,2.0204330461,0.1008688888,0.2602187103   | Cu,0,1.4286094258,-0.9290890303,-0.9912615378 |
| Br,0,4.1887788384,0.0402494563,0.717449814    | Br,0,2.9092084086,-2.3814177493,-1.76769765   |
| C,0,-1.1239227241,-1.7455829903,0.0780500342  | C,0,-0.2499448013,1.3950921202,1.7327358774   |
| C,0,-1.4185002718,-0.0752617474,-3.470002191  | C,0,0.7936514424,4.2939478885,1.3189405635    |
| N,0,1.4615304851,-0.7956069543,-1.2904524996  | N,0,2.1852215043,0.5910780204,-0.1642855429   |
| N,0,0.3604432355,-0.9981355957,-1.6088030597  | N,0,1.5834246122,1.5006466324,0.2427372827    |
| C,0,-1.9673401893,-0.5998009839,-2.1610262235 | C,0,0.1880125934,3.4623332603,0.2111327449    |
| O,0,-0.1917202543,-2.3689533499,0.5381601188  | O,0,0.1928670959,0.3891199065,2.2436679011    |
| O,0,-2.3768335729,-1.8193217189,0.5323486265  | O,0,-1.2881956709,2.1059044455,2.1903627557   |
| C,0,-2.5746558139,-2.6983424781,1.6627317226  | C,0,-1.9469997063,1.5633035777,3.3580184019   |
| H,0,-3.9386727194,-0.7291041705,-2.8619418627 | H,0,-0.3023347109,5.1018660543,-1.0129291768  |
| H,0,-3.7042196863,-1.2661752346,-1.1105045466 | H,0,-0.7187231396,3.4610054314,-1.7276016854  |
| H,0,-2.233725816,-3.706713821,1.4213392509    | H,0,-1.2250468146,1.4105127651,4.1624973938   |
| H,0,-2.0219708605,-2.3175724144,2.5243769813  | H,0,-2.424703453,0.6131899472,3.1078297902    |
| H,0,-3.647456414,-2.6814409988,1.8509799568   | H,0,-2.6926106382,2.307074937,3.636285324     |
| H,0,-2.2302179445,0.0667246183,-4.1870817553  | H,0,0.769231467,5.3576511976,1.0660903068     |
| H,0,-0.9207518017,0.8925344083,-3.3422445321  | H,0,1.8386355307,4.0071091349,1.4928297562    |
| H,0,-0.6914512373,-0.7714342873,-3.9062314986 | H,0,0.2542918939,4.1504865447,2.2611887196    |
| O,0,-3.9339442698,2.4887212839,-0.1743059188  | O,0,-4.4268942133,-1.6016908915,1.1927937971  |
| O,0,-2.3935670238,2.4082282477,-1.7227152909  | O,0,-2.8412350513,-3.0939909155,0.9815119434  |
| $\nu_1 = -224.3246 \text{ cm}^{-1}$           | $\nu_1 = -359.0419 \text{ cm}^{-1}$           |
| $G = -5157.999322$                            | $G = -5157.998956$                            |

**II.- Cartesian coordinates and Gibbs free energies of the stationary points located on the potential-energy surface for formation of copper(I) carbene intermediate VII via N<sub>2</sub>-extrusion from complex Va.**

*Stationary points located at Becke3LYP/6-31G(d) level of theory.*

|                                                                                                                                                                                                                                                                                                                                                                                                                                                                                                                                                                                                                                                                                                                                                                                                                                                                                                                                                                                                                                                                                                                                                                                                                                                            |                                                                                                                                                                                                                                                                                                                                                                                                                                                                                                                                                                                                                                                                                                                                                                                                                                                                                                                                                                                                                                                                                                                                                                                                                                                                                                                        |
|------------------------------------------------------------------------------------------------------------------------------------------------------------------------------------------------------------------------------------------------------------------------------------------------------------------------------------------------------------------------------------------------------------------------------------------------------------------------------------------------------------------------------------------------------------------------------------------------------------------------------------------------------------------------------------------------------------------------------------------------------------------------------------------------------------------------------------------------------------------------------------------------------------------------------------------------------------------------------------------------------------------------------------------------------------------------------------------------------------------------------------------------------------------------------------------------------------------------------------------------------------|------------------------------------------------------------------------------------------------------------------------------------------------------------------------------------------------------------------------------------------------------------------------------------------------------------------------------------------------------------------------------------------------------------------------------------------------------------------------------------------------------------------------------------------------------------------------------------------------------------------------------------------------------------------------------------------------------------------------------------------------------------------------------------------------------------------------------------------------------------------------------------------------------------------------------------------------------------------------------------------------------------------------------------------------------------------------------------------------------------------------------------------------------------------------------------------------------------------------------------------------------------------------------------------------------------------------|
| <p><b>Va</b></p> <p>C,0,1.2938922796,-0.8026148624,-1.4258392517<br/>           C,0,1.472795082,1.7366526506,-1.6381821501<br/>           C,0,-0.8069109074,0.5706106664,-1.6106584536<br/>           Cu,0,0.760560491,-0.2637239308,0.3829323752<br/>           Br,0,1.4533410302,-1.4049748652,2.17990455<br/>           C,0,-1.5920781205,0.8442895036,-0.4245443427<br/>           N,0,-1.8241691696,0.6239559113,-3.8395824362<br/>           N,0,-1.368313807,0.6162750021,-2.7981343835<br/>           C,0,0.68208937,0.4541905369,-1.4542312134<br/>           H,0,2.5276322528,1.5932895776,-1.3837253244<br/>           H,0,1.0752738516,2.5453104257,-1.014301656<br/>           H,0,1.4231209305,2.0733810731,-2.6830597104<br/>           O,0,2.3714127324,-0.886783445,-1.5438885047<br/>           H,0,0.728388447,-1.7026900508,-1.6579661423<br/>           O,0,-1.0537481267,0.7820922945,0.6917232496<br/>           O,0,-2.8764793063,1.1379226666,-0.6147421424<br/>           C,0,-3.6624211502,1.3530329685,0.579829374<br/>           H,0,-4.6737038081,1.5428385978,0.222312584<br/>           H,0,-3.2778349357,2.2122981886,1.1332651187<br/>           H,0,-3.6324787869,0.4657650424,1.2155906115</p> <p>G = -4705.338952</p> | <p><b>TS4</b></p> <p>C,0,1.5363035509,-0.2994767424,1.4256475387<br/>           C,0,1.1072299624,2.2240114473,1.3104771494<br/>           C,0,-0.7560536019,0.4229101484,1.2477394394<br/>           Cu,0,0.6498154783,-0.2901337596,-0.3445588029<br/>           Br,0,1.626135133,-1.7369948295,-1.7545687643<br/>           C,0,-1.5466271308,0.8818035888,0.1477053576<br/>           N,0,-2.000342617,0.4658619655,3.7406238843<br/>           N,0,-1.6723676388,0.8044011889,2.72863448<br/>           C,0,0.6401681963,0.783960931,1.358982006<br/>           H,0,2.1886856217,2.2953256034,1.1590755402<br/>           H,0,0.8686605979,2.7172542148,2.2626951517<br/>           H,0,0.6044300542,2.7861215741,0.5160364225<br/>           H,0,2.6089711326,-0.1230605016,1.4356197407<br/>           H,0,1.2113324788,-1.2581860648,1.8218771802<br/>           O,0,-1.0381019402,0.7166910548,-0.9934442286<br/>           O,0,-2.7898635155,1.3143167438,0.3266575623<br/>           C,0,-3.5769255996,1.4923063416,-0.8720967953<br/>           H,0,-4.5500592765,1.8360461667,-0.5228470184<br/>           H,0,-3.6689919569,0.5452528476,-1.4084131977<br/>           H,0,-3.1142840033,2.2369454594,-1.5231751808</p> <p><math>\nu_i = -495.7 \text{ cm}^{-1}</math><br/>           G = -4705.304876</p> |
| <p><b>TS5</b></p> <p>C,0,2.0088394137,-0.0993218519,1.241998022<br/>           C,0,2.0365305264,2.4426585622,1.1927933168<br/>           C,0,-0.0376230742,0.9073734082,0.8552544<br/>           Cu,0,-0.0446342114,-0.7438255457,0.0800627102<br/>           Br,0,0.146878975,-2.6525824834,-1.016554339<br/>           C,0,-0.8935367454,2.0659115155,0.5776448945<br/>           C,0,1.3274875386,1.1098360874,1.1660978796<br/>           H,0,3.0756839362,2.3430039982,1.5177616017<br/>           H,0,1.516100368,3.1152902903,1.8812635857<br/>           H,0,2.0254357197,2.9195176849,0.2052705674<br/>           H,0,3.0847090693,-0.1694780061,1.086860986<br/>           H,0,1.522384225,-1.0048389851,1.5873629365<br/>           O,0,-1.1598941073,2.9029268736,1.4218196357<br/>           O,0,-1.3960947052,2.0536440587,-0.6707979289<br/>           C,0,-2.2904523211,3.1360111486,-0.9955488577<br/>           H,0,-2.5662598746,2.9801045892,-2.0379571538<br/>           H,0,-1.7903592249,4.0994336553,-0.86757263<br/>           H,0,-3.1736277393,3.1009138381,-0.3530182109</p> <p><math>\nu_i = -286.6 \text{ cm}^{-1}</math><br/>           G = -4595.801857</p>                                                                | <p><b>VI</b></p> <p>C,0,1.7549279841,0.0763504285,1.3540424431<br/>           C,0,1.5705697457,2.5865790676,2.3761702838<br/>           C,0,0.1755025338,1.1693214446,0.6729300323<br/>           Cu,0,0.4610280262,-0.5818748817,0.0770651448<br/>           Br,0,0.1402693051,-2.4740298446,-1.0394023873<br/>           C,0,-0.9704734723,1.9536390626,0.1753203414<br/>           C,0,1.1522903934,1.4377524041,1.5309029396<br/>           H,0,2.5886751237,2.9024053659,2.1122036433<br/>           H,0,1.5962354144,2.2914746456,3.4336282335<br/>           H,0,0.8890759514,3.4309980593,2.2547676216<br/>           H,0,2.7187637147,0.0299969778,0.8376964239<br/>           H,0,1.6885616817,-0.6041718531,2.2085763581<br/>           O,0,-1.2273688355,3.0915024079,0.509955771<br/>           O,0,-1.6962417575,1.2326116985,-0.7046841705<br/>           C,0,-2.8470380413,1.8923771688,-1.2637468955<br/>           H,0,-3.2965445619,1.1650703295,-1.938789972<br/>           H,0,-2.5427589533,2.7900439633,-1.8079845612<br/>           H,0,-3.5470369254,2.1705683353,-0.4717910624</p> <p>G = -4595.824850</p>                                                                                                                                                                                   |



| <b>VI + N<sub>2</sub></b>                                                                                                                                                                                                                                                                                                                                                                                                                                                                                                                                                                                                                                                                                                                                                                                                                                                                                                                                                               | <b>VII</b>                                                                                                                                                                                                                                                                                                                                                                                                                                                                                                                                                                                                                                                                                                                                                                                                                                                                                                |
|-----------------------------------------------------------------------------------------------------------------------------------------------------------------------------------------------------------------------------------------------------------------------------------------------------------------------------------------------------------------------------------------------------------------------------------------------------------------------------------------------------------------------------------------------------------------------------------------------------------------------------------------------------------------------------------------------------------------------------------------------------------------------------------------------------------------------------------------------------------------------------------------------------------------------------------------------------------------------------------------|-----------------------------------------------------------------------------------------------------------------------------------------------------------------------------------------------------------------------------------------------------------------------------------------------------------------------------------------------------------------------------------------------------------------------------------------------------------------------------------------------------------------------------------------------------------------------------------------------------------------------------------------------------------------------------------------------------------------------------------------------------------------------------------------------------------------------------------------------------------------------------------------------------------|
| C,0,1.7798843588,-0.5471132427,0.9213305175<br>C,0,1.5525967454,2.0117438954,1.258172<br>C,0,-0.3375871892,0.2350972674,1.0209498512<br>Cu,0,0.3785570248,-0.7421680271,-0.4665767387<br>Br,0,1.3172112167,-1.9397843539,-2.1185972884<br>C,0,-1.3326607847,0.8937150149,0.2347147964<br>N,0,-2.2052251532,1.896868754,4.399140886<br>N,0,-1.2224836732,1.95637293,3.8967986417<br>C,0,0.9817704391,0.6217957496,1.1776662436<br>H,0,2.3144306211,2.1688586147,0.485121363<br>H,0,2.0441389497,2.1529007731,2.228855551<br>H,0,0.7749612751,2.7727979746,1.1537770363<br>H,0,2.8050102079,-0.4430141952,0.5697976135<br>H,0,1.5689271787,-1.4589540864,1.473677226<br>O,0,-1.3432453665,0.4852929458,-0.9561181936<br>O,0,-2.2049717227,1.7574657637,0.7278896412<br>C,0,-3.2556542211,2.1872919153,-0.1711111791<br>H,0,-3.9034426555,2.8220813166,0.4323065603<br>H,0,-3.8023265563,1.3218368013,-0.551309717<br>H,0,-2.8326429161,2.7488729083,-1.0066767686<br><br>G = -4705.345226 | C,0,0.3420334238,-2.6222855665,-1.0258278691<br>C,0,0.5962605586,-0.2603445707,-0.867232331<br>C,0,1.2936949099,0.9526162355,-1.3379358468<br>C,0,1.9374337776,-1.5671157365,-2.6516697868<br>Br,0,-2.019416674,-0.1266585912,2.1128990467<br>Cu,0,-0.6425627921,-0.0875588596,0.4119758012<br>C,0,0.9393093548,-1.5038609663,-1.5174547015<br>O,0,0.9798121326,1.4847420941,-2.3874559476<br>O,0,2.2205815174,1.4105545065,-0.4859253435<br>C,0,2.8651994124,2.6443399101,-0.8692673983<br>H,0,0.5740236976,-3.6177233295,-1.3960718272<br>H,0,-0.3820176265,-2.5394212085,-0.2203773818<br>H,0,2.128831468,3.4484408482,-0.939003175<br>H,0,3.3684814037,2.5299926052,-1.8323619933<br>H,0,3.5858950081,2.849371269,-0.0785148308<br>H,0,2.0603956959,-2.5895721635,-3.0186614697<br>H,0,2.918750124,-1.1989253873,-2.3280064468<br>H,0,1.612806967,-0.9323736518,-3.4823898149<br><br>G = -4595.815235 |

**III.- Potential-energy Surface for Formation of Copper(I) carbene Intermediate VII via N<sub>2</sub>-extrusion from Complex Va at Becke3LYP/6-311+G(d) and MP2/6-311+G(d) Levels of theory.**

The formation of copper(I) carbene intermediate **VII**, was also studied at Becke3LYP/6-311+G(d) and MP2/6-311+G(d) levels of theory [using the 6-31G(d) basis set for Cu and Br]. In both cases, the potential-energy surface is very close to that obtained at the Becke3/6-31G(d) level of theory.

The values of the activation and reaction free energies are collected in Table S3.

**Table S3. Values of  $\Delta G$  in the Formation of VII at different levels of theory (the values at the Becke3LYP/6-31G(d) are also given for comparison).**

| Level of Theory: B3LYP/6-311+G* [6-31G* in Cu and Br] |     |       |                     |     |       |       |
|-------------------------------------------------------|-----|-------|---------------------|-----|-------|-------|
| Stationary Point                                      | Va  | TS4   | VI + N <sub>2</sub> | VI  | TS5   | VII   |
| $\Delta G$                                            | 0.0 | +22.3 | -8.4                | 0.0 | +11.8 | +2.0  |
| Level of Theory: MP2/6-311+G* [6-31G* in Cu and Br]   |     |       |                     |     |       |       |
| Stationary Point                                      | Va  | TS4   | VI + N <sub>2</sub> | VI  | TS5   | VII   |
| $\Delta G$                                            | 0.0 | +19.4 | -19.4               | 0.0 | +26.6 | +20.1 |
| Level of Theory: B3LYP/6-31G*                         |     |       |                     |     |       |       |
| Stationary Point                                      | Va  | TS4   | VI + N <sub>2</sub> | VI  | TS5   | VII   |
| $\Delta G$                                            | 0.0 | +21.4 | -3.9                | 0.0 | +14.4 | +6.0  |

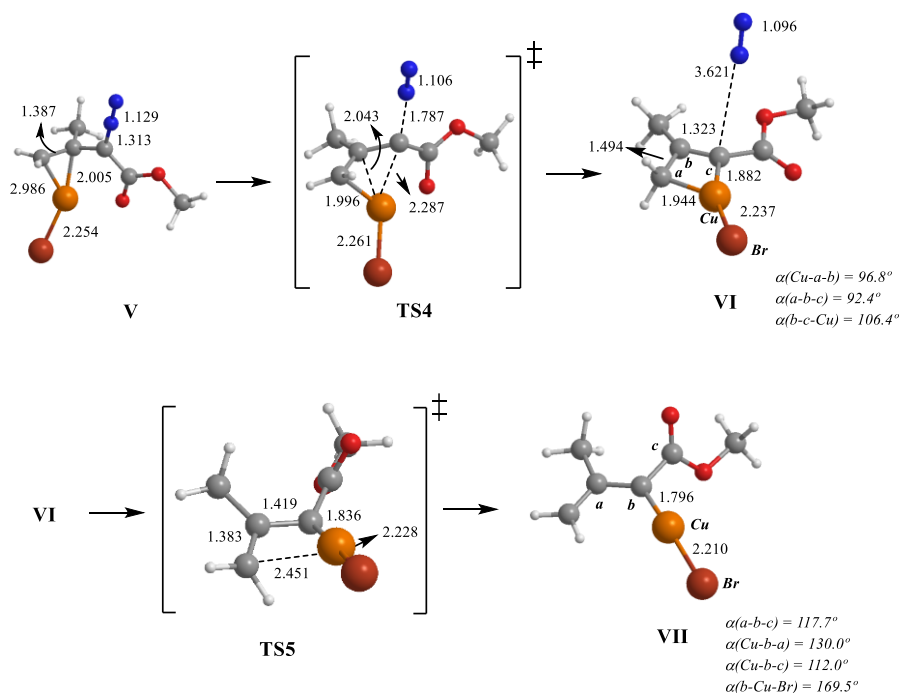

**Scheme S4.** Selected geometrical parameters of the stationary points located for the formation of **VII** at the B3LYP/6-311+G\* [6-31G\* on Cu and Br] level of theory.

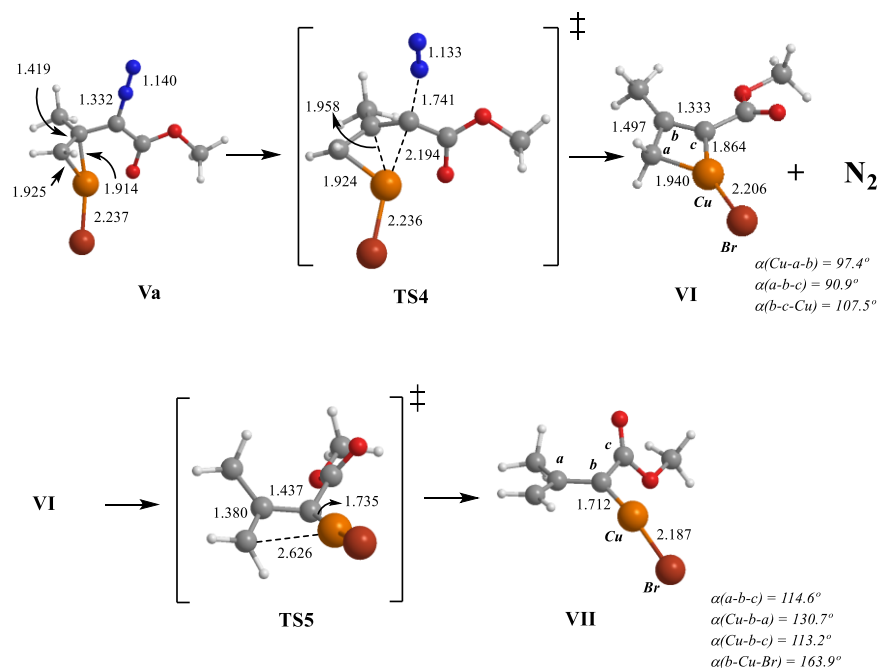

**Scheme S5.** Selected geometrical parameters of the stationary points located for the formation of **VII** at the MP2/6-311+G\* [6-31G\* on Cu and Br] level of theory.

*Stationary points located at Becke3LYP/6-311+G(d) [6-31G\* on Cu and Br] level of theory.*

| <b>V-a</b>                                   | <b>TS4</b>                                              |
|----------------------------------------------|---------------------------------------------------------|
| C,0,1.2521616945,-0.5544441212,-1.595116736  | C,0,1.5223050862,-0.6012683514,1.3401358466             |
| C,0,1.2800369257,1.9873220016,-1.5093643948  | C,0,1.5220757318,1.9515470803,1.3132010243              |
| C,0,-0.9184383475,0.6830075151,-1.5261189002 | C,0,-0.6170533861,0.4991785034,1.3176855965             |
| Cu,0,0.8327434414,-0.2664275034,0.3246751798 | Cu,0,0.5808761542,-0.4038442223,-0.4083185906           |
| Br,0,1.6411252128,-1.4982814659,2.0308190587 | Br,0,1.2485244617,-1.9274191336,-1.9397345521           |
| C,0,-1.6786984282,0.8112745956,-0.3015004029 | C,0,-1.3853370005,1.1357247792,0.2942024569             |
| N,0,-2.0365630465,0.7348246227,-3.695981631  | N,0,-1.7386173433,0.684753645,3.870928555               |
| N,0,-1.528088422,0.7234651581,-2.6878435416  | N,0,-1.3583091954,0.9740635721,2.8730571474             |
| C,0,0.5773166284,0.6475723455,-1.441658901   | C,0,0.8238524478,0.6111137948,1.3482398573              |
| H,0,2.3540314333,1.8881565704,-1.3384194606  | H,0,2.5848579288,1.8548392461,1.0817344226              |
| H,0,0.8822511977,2.6946926707,-0.7766625864  | H,0,1.4420141758,2.4289173342,2.2971805815              |
| H,0,1.1432938472,2.4382681492,-2.4995961727  | H,0,1.0689352615,2.6323082561,0.5887653915              |
| H,0,2.3247158161,-0.5561532935,-1.7580063628 | H,0,2.6050723403,-0.6004150413,1.2777818369             |
| H,0,0.721847995,-1.4615903722,-1.8672043881  | H,0,1.0555279597,-1.5037148776,1.7197477502             |
| O,0,-1.1008010472,0.7392240347,0.7822475287  | O,0,-0.9788893692,0.9666229757,-0.8765834072            |
| O,0,-2.9915283908,0.990132048,-0.4381867917  | O,0,-2.528729976,1.749361286,0.5782119128               |
| C,0,-3.757304384,1.0678435573,0.7857623063   | C,0,-3.348428747,2.1281761173,-0.5505352781             |
| H,0,-4.789780385,1.1785653679,0.4659298966   | H,0,-4.2262559374,2.5986970336,-0.1157176495            |
| H,0,-3.4388417553,1.9283732811,1.3727713219  | H,0,-3.6268244288,1.2461064341,-1.1260923114            |
| H,0,-3.6257091506,0.1576040408,1.3692129689  | H,0,-2.8121361905,2.8279875841,-1.1899565546            |
| G = -4705.169888                             | $\nu_i = -496.3014 \text{ cm}^{-1}$<br>G = -4705.134521 |

|                                                                                                                                                                                                                                                                                                                                                                                                                                                                                                                                                                                                                                                                                                                                                                                                                                                                                                                                                                                                                                                                                    |                                                                                                                                                                                                                                                                                                                                                                                                                                                                                                                                                                                                                                                                                                                                                                                                                                                                                                                                                                    |
|------------------------------------------------------------------------------------------------------------------------------------------------------------------------------------------------------------------------------------------------------------------------------------------------------------------------------------------------------------------------------------------------------------------------------------------------------------------------------------------------------------------------------------------------------------------------------------------------------------------------------------------------------------------------------------------------------------------------------------------------------------------------------------------------------------------------------------------------------------------------------------------------------------------------------------------------------------------------------------------------------------------------------------------------------------------------------------|--------------------------------------------------------------------------------------------------------------------------------------------------------------------------------------------------------------------------------------------------------------------------------------------------------------------------------------------------------------------------------------------------------------------------------------------------------------------------------------------------------------------------------------------------------------------------------------------------------------------------------------------------------------------------------------------------------------------------------------------------------------------------------------------------------------------------------------------------------------------------------------------------------------------------------------------------------------------|
| <p><b>VI + N<sub>2</sub></b></p> <p>C,0,2.0863602254,-0.005791327,-0.5721775167<br/> C,0,2.0584584192,2.613744088,-1.2139656551<br/> C,0,0.2418393846,0.8575572399,-0.5345249282<br/> Cu,0,0.4453925175,-0.9866964857,-0.218300537<br/> Br,0,-0.0081725674,-3.122816955,0.2646733147<br/> C,0,-1.1445158721,1.3236412223,-0.6839226883<br/> N,0,-0.1691909541,2.9953652709,3.636902457<br/> N,0,-0.1275335321,2.3864461713,2.7270927322<br/> C,0,1.4528916129,1.3313536685,-0.780161517<br/> H,0,2.5626491416,2.4857106556,-2.1787798745<br/> H,0,2.8234729635,2.9398483259,-0.5004048495<br/> H,0,1.3076733518,3.3982776746,-1.3097916198<br/> H,0,2.5439719615,-0.4644600104,-1.4507718454<br/> H,0,2.638646264,-0.1583320306,0.3566909094<br/> O,0,-2.092945839,0.5804409684,-0.7930628943<br/> O,0,-1.2320938572,2.6709411693,-0.6952682743<br/> C,0,-2.5610678792,3.2084678605,-0.8523688632<br/> H,0,-2.9760726372,2.9174223767,-1.8175529113<br/> H,0,-2.4438984537,4.2882210573,-0.7941014726<br/> H,0,-3.213192111,2.8485297479,-0.0567287434</p> <p>G = -4705.183256</p> | <p><b>VI</b></p> <p>C,0,2.0473620262,0.3130020493,0.2030614243<br/> C,0,2.0466842334,3.0039848957,0.1024124454<br/> C,0,0.186321475,1.166201189,0.1645609963<br/> Cu,0,0.3942060389,-0.6985853127,0.0439292426<br/> Br,0,0.0195313899,-2.8968088095,-0.1121692976<br/> C,0,-1.1665634064,1.6865976108,-0.0779434801<br/> C,0,1.413713796,1.6649413121,0.1882323147<br/> H,0,2.7115804122,3.0543281474,-0.7673691497<br/> H,0,2.6705390017,3.1914872255,0.9834968197<br/> H,0,1.3018741278,3.7958699122,0.026180749<br/> H,0,2.6578719125,0.0505430535,-0.6632098643<br/> H,0,2.4373981705,-0.0455572967,1.1565986683<br/> O,0,-2.0631955727,1.0249523435,-0.5499981904<br/> O,0,-1.2882733843,2.9809270885,0.2837858509<br/> C,0,-2.5908057281,3.5651480179,0.0773625664<br/> H,0,-2.8440730317,3.5636005505,-0.9829133364<br/> H,0,-2.511926691,4.5824839135,0.452836241<br/> H,0,-3.3473603981,3.0082409897,0.6299383682</p> <p>G = -4595.619349</p>             |
| <p><b>TSS</b></p> <p>C,0,2.0747571274,-0.282884862,0.880032318<br/> C,0,2.0852109417,2.2447618726,0.8530107371<br/> C,0,-0.0282742459,0.7412018067,0.8583198686<br/> Cu,0,-0.075517241,-0.7620738227,-0.1944992015<br/> Br,0,0.0962844911,-2.5136743383,-1.5611214062<br/> C,0,-0.9150118828,1.8968956094,0.7588707849<br/> C,0,1.3793484594,0.9121813346,0.9067737748<br/> H,0,3.1691099461,2.1314029403,0.7980329634<br/> H,0,1.8548158771,2.8174852932,1.7559154792<br/> H,0,1.7550219145,2.8403471432,-0.0019397998<br/> H,0,3.135885959,-0.3206416497,0.6454856983<br/> H,0,1.6531232947,-1.1980663254,1.2746128669<br/> O,0,-1.3874375539,2.2429994021,-0.3051566543<br/> O,0,-1.1706814691,2.488200865,1.9361355849<br/> C,0,-2.1296239137,3.5668694189,1.9103776668<br/> H,0,-2.2506090103,3.8677591244,2.9478074081<br/> H,0,-3.0768864321,3.2209854926,1.4971152228<br/> H,0,-1.7539054822,4.3957174621,1.3105538776</p> <p><math>\nu_1 = -257.1833 \text{ cm}^{-1}</math><br/> G = -4595.600492</p>                                                                     | <p><b>VII</b></p> <p>C,0,1.0306888493,-2.8432269936,-0.4401194199<br/> C,0,1.0248255493,-0.4585218931,-0.3941095473<br/> C,0,1.8002650664,0.7989275251,-0.3910803053<br/> C,0,3.2676677095,-1.7353802286,-0.468876503<br/> Br,0,-2.8169715417,0.1554008911,0.4879265696<br/> Cu,0,-0.7335696673,-0.1662700749,-0.1755161715<br/> C,0,1.7569189949,-1.6958847752,-0.4421629166<br/> O,0,2.4507978821,1.1772819267,-1.3407773507<br/> O,0,1.6228751902,1.4879344141,0.7466619166<br/> C,0,2.3404066847,2.7343574437,0.8607276361<br/> H,0,1.5012252173,-3.8216944888,-0.4309428547<br/> H,0,-0.053160405,-2.8161265758,-0.4331335479<br/> H,0,2.0030314973,3.4349062963,0.097395836<br/> H,0,3.4123795477,2.5679973944,0.7541800467<br/> H,0,2.1061059683,3.1079412372,1.8537110137<br/> H,0,3.6394514386,-2.7610062268,-0.4828704596<br/> H,0,3.6902556094,-1.2367217038,0.4086415836<br/> H,0,3.6542137326,-1.2158521449,-1.3477927699</p> <p>G = -4595.616189</p> |

Stationary points located at MP2/6-311+G(d) [6-31G\* on Cu and Br] level of theory.

|                                                                                                                                                                                                                                                                                                                                                                                                                                                                                                                                                                                                                                                                                                                                                                                                                                                                                                                                                                                                                                                                     |                                                                                                                                                                                                                                                                                                                                                                                                                                                                                                                                                                                                                                                                                                                                                                                                                                                                                                                                                                                                                                                                                                                   |
|---------------------------------------------------------------------------------------------------------------------------------------------------------------------------------------------------------------------------------------------------------------------------------------------------------------------------------------------------------------------------------------------------------------------------------------------------------------------------------------------------------------------------------------------------------------------------------------------------------------------------------------------------------------------------------------------------------------------------------------------------------------------------------------------------------------------------------------------------------------------------------------------------------------------------------------------------------------------------------------------------------------------------------------------------------------------|-------------------------------------------------------------------------------------------------------------------------------------------------------------------------------------------------------------------------------------------------------------------------------------------------------------------------------------------------------------------------------------------------------------------------------------------------------------------------------------------------------------------------------------------------------------------------------------------------------------------------------------------------------------------------------------------------------------------------------------------------------------------------------------------------------------------------------------------------------------------------------------------------------------------------------------------------------------------------------------------------------------------------------------------------------------------------------------------------------------------|
| <p><b>V-a</b></p> <p>C,0,1.4275366221,-0.5837286261,-1.4658694677<br/> C,0,1.3172279519,1.9839692657,-1.5556520233<br/> C,0,-0.8026373917,0.5689114317,-1.5281999384<br/> Cu,0,0.8224407418,-0.1960608035,0.3203994876<br/> Br,0,1.4100184051,-1.4825559098,2.0530904344<br/> C,0,-1.5742219318,0.78308441,-0.3342724395<br/> N,0,-1.9119775506,0.6248957759,-3.7367756329<br/> N,0,-1.4072397867,0.6236980473,-2.7141299373<br/> C,0,0.6803158235,0.6205901662,-1.4046468551<br/> H,0,2.3861082862,1.9498267802,-1.3267040135<br/> H,0,0.8476207754,2.7212588195,-0.8971346295<br/> H,0,1.2083750891,2.3438866212,-2.5863156302<br/> H,0,2.5030800316,-0.5231037005,-1.6137945887<br/> H,0,0.9429354481,-1.5073854137,-1.7759593927<br/> O,0,-0.990267,0.7810954039,0.7634802591<br/> O,0,-2.8852772492,0.9497084842,-0.4812909019<br/> C,0,-3.6206644231,1.0750772569,0.7586655323<br/> H,0,-4.6597531202,1.1711283527,0.4562999608<br/> H,0,-3.2872184895,1.9584052943,1.3014659283<br/> H,0,-3.4690382616,0.1871920986,1.3710673072</p> <p>G = -4700.802797</p> | <p><b>TS4</b></p> <p>C,0,1.5878115475,-0.7036801051,1.2430179803<br/> C,0,1.5911215274,1.8820306319,1.3419272344<br/> C,0,-0.5389827709,0.4370016435,1.3478330843<br/> Cu,0,0.5778752223,-0.3690047847,-0.3596238402<br/> Br,0,1.0821623784,-1.8200539009,-1.984915374<br/> C,0,-1.3017710073,1.0911892756,0.3298278242<br/> N,0,-1.6738800438,0.6646357707,3.8789562782<br/> N,0,-1.2687154498,0.9223024532,2.8522964549<br/> C,0,0.8931560956,0.544017491,1.343643367<br/> H,0,2.6423291747,1.7929059055,1.055211495<br/> H,0,1.5540449645,2.3066585525,2.3527794451<br/> H,0,1.1006840535,2.5917219499,0.6693373115<br/> H,0,2.6721557509,-0.6900090586,1.160577898<br/> H,0,1.1370597386,-1.5913787831,1.6820113817<br/> O,0,-0.8698702322,0.9487266402,-0.8478706374<br/> O,0,-2.4628396625,1.6733585395,0.6032768473<br/> C,0,-3.2527412505,2.0163252651,-0.5578666561<br/> H,0,-4.1438917454,2.4918435895,-0.1570991715<br/> H,0,-3.507526387,1.1142702111,-1.1134800065<br/> H,0,-2.7006374807,2.7004587062,-1.2005247111</p> <p><math>\nu_i = -621.1028 \text{ cm}^{-1}</math><br/> G = -4700.771859</p> |
| <p><b>VI</b></p> <p>C 0.089356552736 2.173018310555 -0.001997792927<br/> C 2.786051629698 2.429135861879 0.107302919831<br/> C 1.095392289554 0.421793113245 -0.049621583290<br/> Cu -0.768125955883 0.433287118632 -0.009321490128<br/> Br -2.758294220922 -0.517577071721 -0.044600907997<br/> C 1.727771467916 -0.902061765270 0.130467605380<br/> C 1.506136864006 1.689549357394 -0.007271879121<br/> H 2.783434901985 3.049045085639 1.010503484555<br/> H 2.913196816628 3.104526049530 -0.745484341157<br/> H 3.633344407771 1.742525598920 0.144507986030<br/> H -0.238217050043 2.672976831208 0.914471896803<br/> H -0.288144383088 2.604299781020 -0.934283808001<br/> O 1.186798850174 -1.845885974679 0.668283804469<br/> O 2.977273188888 -0.909904979295 -0.374802245931<br/> C 3.661023210042 -2.172765938909 -0.229093343568<br/> H 3.765421299752 -2.426674938072 0.825763710965<br/> H 4.633373522207 -2.022203469106 -0.691164357210<br/> H 3.106572541470 -2.960309870787 -0.739527604524</p> <p>G = -4591.518650</p>                         | <p><b>N<sub>2</sub></b></p> <p>N,0,0,0,0.0348364593<br/> N,0,0,0,0,0.1551635407</p> <p>G = -109.315076</p>                                                                                                                                                                                                                                                                                                                                                                                                                                                                                                                                                                                                                                                                                                                                                                                                                                                                                                                                                                                                        |
| <p><b>TS5</b></p> <p>C,0,2.2289020461,-0.2865285127,0.989507791<br/> C,0,2.052827603,2.2318724002,0.9675542191<br/> C,0,0.041173094,0.5914451882,0.879420957<br/> Cu,0,-0.08358361,-0.7999459554,-0.1436880219<br/> Br,0,-0.0360681533,-2.3332241377,-1.7260186156<br/> C,0,-0.8663832088,1.7443503417,0.8108307911<br/> C,0,1.4500916374,0.8523758395,0.9933177099<br/> H,0,3.1435867629,2.1945922202,0.9465116945<br/> H,0,1.7415088659,2.776278964,1.8626885268<br/> H,0,1.703003716,2.7979919708,0.0997053748<br/> H,0,3.307939625,-0.2408853454,0.8539235173<br/> H,0,1.819291409,-1.2446915252,1.2911684234<br/> O,0,-1.4713130333,2.0239466647,-0.2116361217<br/> O,0,-0.9586036461,2.42326472,1.9670792827<br/> C,0,-1.926217699,3.4913177106,1.9560703441<br/> H,0,-1.9295357638,3.8839869296,2.9697168459<br/> H,0,-2.9100639751,3.1059141306,1.6875832105<br/> H,0,-1.6324479845,4.2614012997,1.2425504288</p> <p><math>\nu_i = -240.3269 \text{ cm}^{-1}</math><br/> G = -4591.476209</p>                                                               | <p><b>VII</b></p> <p>C,0,1.2918830747,-2.8672991571,-0.0053232001<br/> C,0,1.0263832187,-0.4960740516,-0.2432853196<br/> C,0,1.7763693971,0.7847489252,-0.3565557004<br/> C,0,3.2003943216,-1.4521782249,0.777907834<br/> Br,0,-2.7642221195,0.1127645191,0.1672665738<br/> Cu,0,-0.6720508244,-0.2927442448,-0.3219009885<br/> C,0,1.8232641537,-1.6267444124,0.1869449598<br/> O,0,2.7505302302,0.9695206522,-1.0611203063<br/> O,0,1.1774082018,1.7297064471,0.396639823<br/> C,0,1.8698686459,2.9913863264,0.4428011337<br/> H,0,1.8393707441,-3.7704424718,0.2536707449<br/> H,0,0.3086286709,-2.9831420579,-0.4508692553<br/> H,0,1.8997726697,3.4409177553,-0.5494057506<br/> H,0,2.8868248805,2.851600871,0.8103692623<br/> H,0,1.2924750035,3.6062353313,1.1278355447<br/> H,0,3.5911401723,-2.400782678,1.1507786428<br/> H,0,3.1771765347,-0.7426949301,1.6102464904<br/> H,0,3.8893750873,-1.0557201173,0.0290785272</p> <p>G = -4591.486628</p>                                                                                                                                                      |

**IV.- Cartesian coordinates and Gibbs free energies of the stationary points for conjugate addition of pyridine (1a) to carbene intermediate VII, intramolecular cyclization, reductive elimination, and aromatization steps.**

*Stationary points located at Becke3LYP/6-31G(d) level of theory.*

|                                                                                                                                                                                                                                                                                                                                                                                                                                                                                                                                                                                                                                                                                                                                                                                                                                                                                                                                                                                                                                                                                                                                                                                                                                                                                                                                                                                                                                                                                                                                                                        |                                                                                                                                                                                                                                                                                                                                                                                                                                                                                                                                                                                                                                                                                                                                                                                                                                                                                                                                                                                                                                                                                                                                                                                                                                                                                                                                                                                                                                                                                                                          |
|------------------------------------------------------------------------------------------------------------------------------------------------------------------------------------------------------------------------------------------------------------------------------------------------------------------------------------------------------------------------------------------------------------------------------------------------------------------------------------------------------------------------------------------------------------------------------------------------------------------------------------------------------------------------------------------------------------------------------------------------------------------------------------------------------------------------------------------------------------------------------------------------------------------------------------------------------------------------------------------------------------------------------------------------------------------------------------------------------------------------------------------------------------------------------------------------------------------------------------------------------------------------------------------------------------------------------------------------------------------------------------------------------------------------------------------------------------------------------------------------------------------------------------------------------------------------|--------------------------------------------------------------------------------------------------------------------------------------------------------------------------------------------------------------------------------------------------------------------------------------------------------------------------------------------------------------------------------------------------------------------------------------------------------------------------------------------------------------------------------------------------------------------------------------------------------------------------------------------------------------------------------------------------------------------------------------------------------------------------------------------------------------------------------------------------------------------------------------------------------------------------------------------------------------------------------------------------------------------------------------------------------------------------------------------------------------------------------------------------------------------------------------------------------------------------------------------------------------------------------------------------------------------------------------------------------------------------------------------------------------------------------------------------------------------------------------------------------------------------|
| <p><b>TS6</b></p> <p>C,0,1.920108261,-0.5113292512,0.8090193742<br/> N,0,1.9118238984,1.7146362005,0.8118031431<br/> C,0,-0.3891817313,-1.0464434136,0.8150677895<br/> C,0,-1.6296794069,-1.2679196983,1.582162206<br/> C,0,0.7302872435,2.2658995648,1.0957400253<br/> C,0,0.9070354205,-1.1218042273,3.04154254<br/> Br,0,-0.322445553,-0.6721679604,-3.1604866863<br/> Cu,0,-0.4937256905,-0.8483673962,-0.9772274918<br/> C,0,0.529940084,3.6452866567,1.0474901637<br/> C,0,0.8085905119,-0.9173355231,1.5417462929<br/> C,0,1.5999017783,4.4633870281,0.6870754092<br/> O,0,-2.2027208318,-0.3602415659,2.1637946434<br/> O,0,-2.0874959078,-2.5321372422,1.5209055027<br/> C,0,-3.3446810485,-2.7678081687,2.1810367204<br/> H,0,2.919372146,-0.5016241266,1.2335846744<br/> C,0,2.8312446869,3.8778697908,0.3879123642<br/> H,0,1.8369122757,-0.4846504175,-0.2720123644<br/> C,0,2.9426139189,2.4913511769,0.4620003518<br/> H,0,-4.1310444628,-2.1548272581,1.7331552289<br/> H,0,-0.0703883578,1.5781524998,1.3643659607<br/> H,0,-3.2715496343,-2.533228386,3.2462901757<br/> H,0,-3.554491919,-3.8273412023,2.0345307635<br/> H,0,0.2292907727,-0.4491434197,3.5789968438<br/> H,0,-0.4449914395,4.0590149071,1.2833730473<br/> H,0,1.9235053775,-0.9454618716,3.4066474446<br/> H,0,0.6266154998,-2.1464476395,3.3144817993<br/> H,0,1.4767852679,5.5414031503,0.6360872189<br/> H,0,3.6882643766,4.4779866558,0.0992968532<br/> H,0,3.877247798,1.9843536609,0.232851041</p> <p><math>\nu_i = -89.4863 \text{ cm}^{-1}</math><br/> G = -4844.025660</p> | <p><b>VIIIa</b></p> <p>C,0,1.8289305878,-0.2300764683,0.8349512745<br/> N,0,1.8279124676,1.2867691897,0.8334535474<br/> C,0,-0.4700458511,-1.0605169729,0.8309925516<br/> C,0,-1.6922487561,-1.517104137,1.5283895292<br/> C,0,0.9436176623,1.8963093604,0.0135199004<br/> C,0,0.7987248152,-0.9001486019,3.0704984589<br/> Br,0,-0.1521222938,-0.0394018475,-3.0636376077<br/> Cu,0,-0.5291797399,-0.742906028,-0.9986997742<br/> C,0,0.8468601423,3.2771553604,-0.010537375<br/> C,0,0.6276651742,-0.7776355364,1.573123821<br/> C,0,1.6601762813,4.0346422866,0.8320938404<br/> O,0,-2.3167099155,-0.8980457792,2.3751257922<br/> O,0,-2.1098045068,-2.724076214,1.0605947196<br/> C,0,-3.3227483716,-3.2175581969,1.6415304337<br/> H,0,2.7921472821,-0.5258330611,1.261573843<br/> C,0,2.5598825142,3.3824569461,1.6794918484<br/> H,0,1.7820062996,-0.5068643694,-0.2195416063<br/> C,0,2.6279115259,1.9990336992,1.6551186236<br/> H,0,-4.1522571796,-2.5316005823,1.446819047<br/> H,0,0.3337793189,1.2125725226,-0.5761912303<br/> H,0,-3.2174045334,-3.3406937643,2.7237391716<br/> H,0,-3.505592775,-4.1815980291,1.1647913175<br/> H,0,-0.1267399418,-1.2177108309,3.5533466369<br/> H,0,0.1378501319,3.7368059994,-0.6897014367<br/> H,0,1.0801321097,0.0626511744,3.5264098097<br/> H,0,1.5944030317,-1.6144243865,3.3294646549<br/> H,0,1.5970198541,5.1183821001,0.8309250895<br/> H,0,3.2091828287,3.9340163027,2.3499599108<br/> H,0,3.3103400719,1.4278815792,2.273038146</p> <p>G = -4844.043749</p> |
| <p><b>TS7</b></p> <p>C,0,2.0279709044,-0.5593466444,0.8319114421<br/> N,0,2.0302816992,0.9448107774,0.8412939616<br/> C,0,-0.3762681693,-1.017017089,0.8320497244<br/> C,0,1.4519974422,1.5888151742,-0.1994937308<br/> C,0,-1.6352357325,-1.404964054,1.505231242<br/> C,0,0.9888173252,-1.554301003,2.9487533893<br/> C,0,1.2670080253,2.9659687421,-0.1580788672<br/> C,0,1.6792018793,3.6802685052,0.9599672443<br/> Br,0,-0.3848138047,0.1929542478,-3.0557840341<br/> Cu,0,-0.5122268235,-0.4392039595,-0.9259155275<br/> C,0,2.2760237576,2.9925788549,2.027249359<br/> C,0,0.7778347285,-1.0783953203,1.5289794597<br/> C,0,2.4331986127,1.6237720639,1.9425765052<br/> H,0,1.1475751475,0.9791358046,-1.0420582898<br/> O,0,-2.0722374784,-0.9502873209,2.5499257398<br/> O,0,-2.3245190654,-2.3236058817,0.7743442306<br/> H,0,0.7997747696,3.4460260875,-1.0106653624<br/> C,0,-3.5839964162,-2.7248251748,1.3272760575<br/> H,0,1.5487246586,4.7567874736,1.0072827536<br/> H,0,2.9595245229,-0.8761758689,1.3090658308<br/> H,0,2.616240166,3.511452128,2.9161056957<br/> H,0,2.876041322,1.0294511269,2.7320907135<br/> H,0,-4.25585328,-1.8668238293,1.4215236668<br/> H,0,-3.4511213067,-3.1757885579,2.3153222068<br/> H,0,-3.9928944006,-3.4545202715,0.6271882593<br/> H,0,1.7164457942,-2.3778525252,2.9920917992<br/> H,0,0.0532056821,-1.887325994,3.3997232645<br/> H,0,1.382722923,-0.7536048958,3.5948051376<br/> H,0,2.045441359,-0.8450986786,-0.2202326338</p> <p><math>\nu_i = -55.7638 \text{ cm}^{-1}</math><br/> G = -4844.040627</p>  | <p><b>IXa</b></p> <p>C,0,2.3764928787,-1.4270411811,0.6772988558<br/> N,0,2.3714414823,0.0287978823,0.6783670966<br/> C,0,-0.107258133,-1.29922709,0.66620203<br/> C,0,1.7120972967,0.6552040845,-0.3789125699<br/> C,0,-1.4616575945,-1.817555984,0.962771976<br/> C,0,1.0635213441,-3.3953506615,1.5646820475<br/> C,0,1.706214523,2.0929533454,-0.346647205<br/> C,0,2.0173618286,2.7683563436,0.8022904271<br/> Br,0,-1.1545366527,1.5532178777,-2.0587223945<br/> Cu,0,-0.2779131553,0.2464249662,-0.4235466567<br/> C,0,2.4081670734,2.0412982918,1.9600428714<br/> C,0,0.9869608871,-2.0093131649,0.9718016029<br/> C,0,2.5713799545,0.6876541367,1.8596232858<br/> H,0,1.8905154326,0.1685907154,-1.3377789495<br/> O,0,-1.83268538,-2.5362071051,1.8711675916<br/> O,0,-2.3270516389,-1.3023473413,0.0390465581<br/> H,0,1.3748942501,2.6084218058,-1.238682068<br/> C,0,-3.7077984365,-1.664970831,0.1832901211<br/> H,0,1.9723232061,3.8525897494,0.8294520863<br/> H,0,3.0995304366,-1.765420859,1.4263374701<br/> H,0,2.6177711827,2.5383737453,2.8998049082<br/> H,0,2.903052366,0.0727662513,2.6883436719<br/> H,0,-4.0860993709,-1.349395482,1.1594690749<br/> H,0,-3.8312224878,-2.7473280738,0.0866332315<br/> H,0,-4.2304849679,-1.1450967082,-0.6193900632<br/> H,0,1.7158701394,-4.0400639164,0.9579190244<br/> H,0,0.0795691999,-3.8549368324,1.6487271294<br/> H,0,1.5048553015,-3.3608778003,2.5712459472<br/> H,0,2.7426057029,-1.771765678,-0.298888143</p> <p>G = -4844.060347</p>            |

| <i>TS8</i>                                    | <i>Xa</i>                                     |
|-----------------------------------------------|-----------------------------------------------|
| C,0,2.5661195269,-1.5686010831,-0.6853786973  | C,0,2.6072137643,-2.1479488816,-1.1624602653  |
| N,0,2.5608976711,-0.1078738284,-0.6819364535  | N,0,2.6052557618,-0.6803713976,-1.1602394431  |
| C,0,0.1851795778,-1.0949737383,-0.6779043486  | C,0,0.3762350612,-1.4598448305,-1.1769498205  |
| C,0,1.3763787803,0.3674548626,-1.329790142    | C,0,1.2648075484,-0.2851273481,-1.6585526221  |
| C,0,-1.2315293943,-1.3542593709,-1.0315835433 | C,0,-1.0964444363,-1.4578074342,-1.0756792583 |
| C,0,0.9305513826,-3.5424926286,-0.5655244228  | C,0,0.7830990042,-3.9294164293,-0.5489765833  |
| C,0,1.0561854693,1.7854767077,-1.1315159804   | C,0,0.8777818076,1.133767079,-1.2851075047    |
| C,0,1.4388756382,2.3839398628,0.0505334386    | C,0,1.5157387598,1.7856106078,-0.2246424907   |
| Br,0,-1.5118835282,0.7976201897,1.941365767   | Br,0,-1.4813351251,1.5330177686,2.1350004745  |
| Cu,0,-0.0610828661,0.7205913801,0.2060846878  | Cu,0,-0.2864545791,1.1246895861,0.275945984   |
| C,0,2.4334461085,1.7294157174,0.879433755     | C,0,2.6151982649,1.118890956,0.4667524358     |
| C,0,1.1214575511,-2.054260174,-0.5896496404   | C,0,1.1522015272,-2.5366417241,-0.9421374354  |
| C,0,2.941905316,0.5350413916,0.4934473862     | C,0,3.0810688091,-0.0546718911,-0.0107098082  |
| H,0,1.2924343053,0.042874111,-2.3630446502    | H,0,1.2944496592,-0.3458564778,-2.7579445499  |
| O,0,-1.8757984782,-2.3667594432,-0.8570198921 | O,0,-1.8299558189,-2.4170916554,-1.1691150691 |
| O,0,-1.7472619383,-0.2405425585,-1.6277076008 | O,0,-1.5908043344,-0.1975153631,-0.8235411179 |
| H,0,0.4333203189,2.2881491343,-1.8641458036   | H,0,0.3869974456,1.7175657191,-2.0607398687   |
| C,0,-3.1563960196,-0.291080875,-1.9177638975  | C,0,-3.0318027666,-0.1089019389,-0.6646668965 |
| H,0,1.1496297957,3.4059673187,0.2699577022    | H,0,1.4650095871,2.871031143,-0.1620032711    |
| H,0,3.2092515981,-1.947216543,0.1160787251    | H,0,3.2807769091,-2.5464223825,-0.3965791099  |
| H,0,2.7852273761,2.2005975191,1.7887313554    | H,0,3.0790097127,1.577863063,1.3312019418     |
| H,0,3.7220479167,0.0316878453,1.0539466764    | H,0,3.9269451321,-0.5581454304,0.4493085569   |
| H,0,-3.7218119606,-0.3949900862,-0.9887682006 | H,0,-3.3367509186,-0.6575093576,0.2266730575  |
| H,0,-3.3811976775,-1.1307342135,-2.5798322689 | H,0,-3.5173826194,-0.5187696991,-1.5512346214 |
| H,0,-3.3874559319,0.6571684676,-2.4032114215  | H,0,-3.2373285257,0.9524472078,-0.543498455   |
| H,0,1.575728843,-4.032077368,-1.308515501     | H,0,1.1110149249,-4.6364056952,-1.3239178363  |
| H,0,-0.1097336975,-3.8155255326,-0.7416198852 | H,0,-0.2923820258,-4.044306709,-0.4166942732  |
| H,0,1.2233299043,-3.9390244052,0.4168001998   | H,0,1.3012876681,-4.2167150035,0.375376431    |
| H,0,2.9817118285,-1.9411641306,-1.6350830489  | H,0,2.9509720527,-2.5343893352,-2.135691052   |
| $\nu_i = -229.0861 \text{ cm}^{-1}$           | $G = -4844.065713$                            |
| $G = -4844.030829$                            |                                               |

In the case of the reaction of pyridine **1a**, the transition state **TS<sub>arom</sub>** corresponding to the aromatization of intermediate **Xa** to give the complex between CuBr and indolizine **2** and dihydrogen, was also located, at the Becke3LYP/6-31G(d) level of theory (see Scheme S4). In this transition structure, the dihydrogen molecule is almost fully formed. The values of the activation and reaction free-energies are predicted to be,  $\Delta G^\ddagger = 39.8 \text{ kcal mol}^{-1}$  and  $\Delta G_{\text{rxn}} = 63.4 \text{ kcal mol}^{-1}$ .

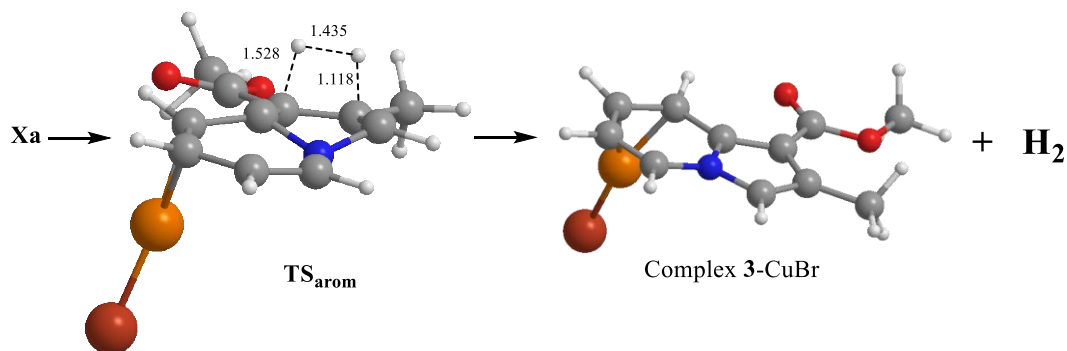

**Scheme S5.** Selected geometrical parameters of the stationary points located for the deshydrogenation of **Xa**.

|                                                                                                                                                                                                                                                                                                                                                                                                                                                                                                                                                                                                                                                                                                                                                                                                                                                                                                                                                                                                                                                                                                                                                                                                                                                                                                                                                                                                                                                                                                                                                                                               |                                                                                                                                                                                                                                                                                                                                                                                                                                                                                                                                                                                                                                                                                                                                                                                                                                                                                                                                                                                                                                                                                                                                                                                                                                                                                                                                                                                                                                                      |
|-----------------------------------------------------------------------------------------------------------------------------------------------------------------------------------------------------------------------------------------------------------------------------------------------------------------------------------------------------------------------------------------------------------------------------------------------------------------------------------------------------------------------------------------------------------------------------------------------------------------------------------------------------------------------------------------------------------------------------------------------------------------------------------------------------------------------------------------------------------------------------------------------------------------------------------------------------------------------------------------------------------------------------------------------------------------------------------------------------------------------------------------------------------------------------------------------------------------------------------------------------------------------------------------------------------------------------------------------------------------------------------------------------------------------------------------------------------------------------------------------------------------------------------------------------------------------------------------------|------------------------------------------------------------------------------------------------------------------------------------------------------------------------------------------------------------------------------------------------------------------------------------------------------------------------------------------------------------------------------------------------------------------------------------------------------------------------------------------------------------------------------------------------------------------------------------------------------------------------------------------------------------------------------------------------------------------------------------------------------------------------------------------------------------------------------------------------------------------------------------------------------------------------------------------------------------------------------------------------------------------------------------------------------------------------------------------------------------------------------------------------------------------------------------------------------------------------------------------------------------------------------------------------------------------------------------------------------------------------------------------------------------------------------------------------------|
| <p><b>TS<sub>arom</sub></b></p> <p>N,0,-0.0379869031,0.402312984,2.0884377889<br/> C,0,0.0717324663,-0.5798767309,1.0601812723<br/> C,0,1.3740612567,-1.2216211346,0.903510081<br/> C,0,2.263491106,-1.1659620575,1.9968800048<br/> C,0,1.8969670039,-0.4275931682,3.1890215551<br/> C,0,0.7581609666,0.3119925246,3.2110129731<br/> C,0,-0.8831296283,-0.1483062301,0.0404932303<br/> H,0,1.4443508367,-2.0050308918,0.1562220326<br/> H,0,3.0588618153,-1.9042062361,2.0763554574<br/> H,0,2.5474211472,-0.4372010091,4.0558418345<br/> H,0,0.4434972796,0.9005454598,4.0660621217<br/> C,0,-1.8190438962,0.6399867369,0.673135982<br/> C,0,-1.4268462786,0.6550212789,2.0730685665<br/> O,0,-0.064370106,-1.5022776965,-1.7367690613<br/> C,0,-0.8543776735,-0.6665322569,-1.3320874414<br/> C,0,-3.1022131051,1.2181371874,0.1597014507<br/> H,0,-3.7164313779,0.4619848126,-0.3390785405<br/> H,0,-3.6827395535,1.6634177732,0.9734386641<br/> H,0,-2.9016333178,1.9983705915,-0.5827599922<br/> Cu,0,2.8004689012,0.0533043738,0.5416740136<br/> H,0,-1.8475680552,1.3283326525,2.81364755<br/> H,0,-1.678530495,-0.7413190192,2.2864787052<br/> O,0,-1.800778446,-0.1024869226,-2.1180386987<br/> H,0,-0.9504687714,-1.4386970425,1.8037697149<br/> C,0,-1.8005359435,-0.5447603072,-3.4863196876<br/> H,0,-0.8411066734,-0.3222959,-3.9599770778<br/> H,0,-1.9842817395,-1.6208053704,-3.5424787861<br/> H,0,-2.6058339433,0.0088148376,-3.9699506632<br/> Br,0,4.1592006119,1.4177649987,-0.5082110571</p> <p><math>\nu_i = -1776.1 \text{ cm}^{-1}</math><br/> G = -4844.002225</p> | <p><b>Complex 3-CuBr</b></p> <p>N,0,-0.8101153853,-1.4294853169,-1.4993637444<br/> C,0,-0.6972299704,-0.0975276524,-1.082332097<br/> C,0,0.5648750359,0.562542309,-1.2236113263<br/> C,0,1.6494200434,-0.1468175263,-1.7988016256<br/> C,0,1.443912336,-1.5035237253,-2.2474677565<br/> C,0,0.2403890914,-2.1118236748,-2.0790401661<br/> C,0,-1.9500404256,0.2897519851,-0.5920424589<br/> H,0,0.5606953885,1.6446323723,-1.1431912011<br/> H,0,2.4966073217,0.40512169,-2.1994573966<br/> H,0,2.2548195566,-2.0525050529,-2.712529313<br/> H,0,0.0282629976,-3.1275356772,-2.3912194659<br/> C,0,-2.8320839822,-0.8343539125,-0.7150983964<br/> C,0,-2.1016692842,-1.8621375173,-1.2718697647<br/> O,0,-1.3692988802,2.5289663624,-0.0288901134<br/> C,0,-2.1977491088,1.6318662839,-0.0667147261<br/> C,0,-4.2771229322,-0.9282202196,-0.3259136032<br/> H,0,-4.8827530441,-0.189056492,-0.8604208095<br/> H,0,-4.6718918864,-1.9247936464,-0.5477679517<br/> H,0,-4.4136986537,-0.7314025187,0.7423254908<br/> Cu,0,1.8198597709,-0.0817731031,0.1542521827<br/> H,0,-2.3959285909,-2.8701414331,-1.527383107<br/> O,0,-3.4661574417,1.7906168389,0.3861189788<br/> C,0,-3.7625839113,3.0878495361,0.9260429896<br/> H,0,-3.1114845759,3.3089056073,1.7758133706<br/> H,0,-3.6277543279,3.8621257116,0.1660793455<br/> H,0,-4.8048145721,3.0392398535,1.2434172549<br/> Br,0,2.7904503986,-0.3448306895,2.0994236959</p> <p>G = -4842.926545</p> |
| <p><b>Dihydrogen</b></p> <p>H,0,0.,0.,-0.3712061013<br/> H,0,0.,0.,0.3712061013</p> <p>G = -1.176811</p>                                                                                                                                                                                                                                                                                                                                                                                                                                                                                                                                                                                                                                                                                                                                                                                                                                                                                                                                                                                                                                                                                                                                                                                                                                                                                                                                                                                                                                                                                      |                                                                                                                                                                                                                                                                                                                                                                                                                                                                                                                                                                                                                                                                                                                                                                                                                                                                                                                                                                                                                                                                                                                                                                                                                                                                                                                                                                                                                                                      |



**V.- Cartesian coordinates and Gibbs free energies of the stationary points for conjugate addition of 3-methylpyridine (1b) to carbene intermediate VII, intramolecular cyclization and reductive elimination steps.**

*Stationary points located at Becke3LYP/6-31G(d) level of theory for the ortho reaction path:*

| <i>TS6_b</i>                                  | <i>VIIIb</i>                                  |
|-----------------------------------------------|-----------------------------------------------|
| C,0,-0.5077129613,-0.6572014269,1.8867873611  | C,0,1.4063413474,0.3287124544,1.6017199755    |
| N,0,-2.30995573,-0.6696050976,0.4845931287    | N,0,1.1912543031,1.7288824954,1.0539313181    |
| C,0,1.3136586791,-0.8559275009,0.3827540409   | C,0,-0.5249294741,-1.0918426271,1.0918570226  |
| C,0,2.20428079,-1.7262839693,-0.4081918058    | C,0,1.554181959,2.8326078873,1.7400654116     |
| C,0,-2.0283285858,-1.061624229,-0.7575365311  | C,0,-1.8303601977,-1.6889442905,1.4528492172  |
| C,0,0.4760774532,-2.9645060908,1.6068304307   | C,0,-0.3410038656,-0.0096667037,3.4235576108  |
| Br,0,1.2381347804,3.1098551812,-0.0704249725  | C,0,1.3285424018,4.0868598762,1.1976260234    |
| Cu,0,1.3216613201,0.9181873731,0.0545841109   | C,0,0.7439994203,4.1927041559,-0.0665085121   |
| C,0,-2.9937708898,-1.0437449125,-1.7647621609 | Br,0,0.8834644351,-0.8581405175,-2.6934355063 |
| C,0,0.4460403717,-1.4789694423,1.3031280369   | Cu,0,0.0465661726,-1.2412287602,-0.6698504115 |
| C,0,-4.2759110684,-0.6001276,-1.4543151519    | C,0,0.3710295266,3.0421545306,-0.7716118401   |
| O,0,1.8035124149,-2.3559711594,-1.3740216325  | C,0,0.1082284887,-0.3278101231,2.0144459152   |
| O,0,3.4867823861,-1.702784005,-0.001060299    | C,0,0.6061656109,1.8172011956,-0.1567906296   |
| C,0,4.4049419901,-2.4689034548,-0.8025355759  | H,0,2.0245211667,2.6724873557,2.7025648066    |
| H,0,-1.1559243017,-0.9994069657,2.6873587107  | O,0,-2.8458084541,-1.0848401118,1.7593811354  |
| C,0,-4.5785166452,-0.181477032,-0.150965076   | O,0,-1.8035361723,-3.044583175,1.3373942545   |
| H,0,-0.4385359365,0.41210321,1.7209102585     | H,0,1.6215770336,4.9680815353,1.7573555546    |
| C,0,-3.5406487055,-0.2407297705,0.7833633424  | C,0,-3.0437999642,-3.7050417633,1.6157465474  |
| H,0,4.4231290686,-2.0903450241,-1.8277387981  | H,0,0.5823574496,5.1727269209,-0.5072924428   |
| H,0,-1.0076589277,-1.392292691,-0.9441846863  | H,0,2.1252249322,0.4398255888,2.4190805865    |
| H,0,4.1184509722,-3.5238071992,-0.8156440195  | C,0,-0.2574912256,3.06580474,-2.1401864368    |
| H,0,5.3785038803,-2.3409164896,-0.3294180831  | H,0,0.3384989278,0.8570337053,-0.5929161602   |
| H,0,0.3350623652,-3.5572658603,0.6962581692   | H,0,-3.821257384,-3.379043346,0.9186402514    |
| H,0,-2.7375997411,-1.3677493159,-2.7683329006 | H,0,-3.3790691184,-3.4956763478,2.6361007687  |
| H,0,-0.3037027101,-3.2450899612,2.3213655844  | H,0,-2.8436626291,-4.770313246,1.4917447823   |
| H,0,1.4432996637,-3.2556917034,2.0344252882   | H,0,0.3727470704,-0.3868415448,4.1710705248   |
| H,0,-5.0454064069,-0.573381741,-2.222386507   | H,0,-1.3244353197,-0.4320059122,3.635338035   |
| C,0,-5.9503677077,0.3143733467,0.2317759264   | H,0,-0.4192060541,1.0771612591,3.58450076     |
| H,0,-3.7052830475,0.0734337952,1.8127986863   | H,0,0.0711610909,3.9393215721,-2.7114430741   |
| H,0,-6.7155641965,-0.4483980997,0.0450036892  | H,0,-1.3509454567,3.1086632961,-2.0605116054  |
| H,0,-6.2269116125,1.2019071808,-0.3495494866  | H,0,-0.0018206696,2.1557639511,-2.6928126111  |
| H,0,-5.9958792849,0.5825451984,1.2915754468   | H,0,1.8631874487,-0.2198597973,0.7761402999   |
| $\nu_1 = -60.8302 \text{ cm}^{-1}$            | G = -4883.340824                              |
| G = -4883.319951                              |                                               |

|                                                                                                                                                                                                                                                                                                                                                                                                                                                                                                                                                                                                                                                                                                                                                                                                                                                                                                                                                                                                                                                                                                                                                                                                                                                                                                                                                                                                                                                                                                                                                                                                                                                                                                                                    |                                                                                                                                                                                                                                                                                                                                                                                                                                                                                                                                                                                                                                                                                                                                                                                                                                                                                                                                                                                                                                                                                                                                                                                                                                                                                                                                                                                                                                                                                                                                                                                                                                                                                             |
|------------------------------------------------------------------------------------------------------------------------------------------------------------------------------------------------------------------------------------------------------------------------------------------------------------------------------------------------------------------------------------------------------------------------------------------------------------------------------------------------------------------------------------------------------------------------------------------------------------------------------------------------------------------------------------------------------------------------------------------------------------------------------------------------------------------------------------------------------------------------------------------------------------------------------------------------------------------------------------------------------------------------------------------------------------------------------------------------------------------------------------------------------------------------------------------------------------------------------------------------------------------------------------------------------------------------------------------------------------------------------------------------------------------------------------------------------------------------------------------------------------------------------------------------------------------------------------------------------------------------------------------------------------------------------------------------------------------------------------|---------------------------------------------------------------------------------------------------------------------------------------------------------------------------------------------------------------------------------------------------------------------------------------------------------------------------------------------------------------------------------------------------------------------------------------------------------------------------------------------------------------------------------------------------------------------------------------------------------------------------------------------------------------------------------------------------------------------------------------------------------------------------------------------------------------------------------------------------------------------------------------------------------------------------------------------------------------------------------------------------------------------------------------------------------------------------------------------------------------------------------------------------------------------------------------------------------------------------------------------------------------------------------------------------------------------------------------------------------------------------------------------------------------------------------------------------------------------------------------------------------------------------------------------------------------------------------------------------------------------------------------------------------------------------------------------|
| <p><b>TS7_b-ortho</b></p> <p>C,0,2.0790688906,-0.7406119963,0.8324469986<br/> N,0,2.0476275619,0.761928645,0.8861218597<br/> C,0,-0.3162773615,-1.2525238977,0.8670064829<br/> C,0,2.4618245687,1.4138501302,1.9969531116<br/> C,0,-1.5479361121,-1.7003428947,1.5542337365<br/> C,0,1.1126984095,-1.8562622685,2.9215150361<br/> C,0,2.2809658462,2.7780691786,2.1105349614<br/> C,0,1.6569752683,3.4759081064,1.0701364089<br/> Br,0,-0.6194711498,0.204369954,-2.9309697561<br/> Cu,0,-0.5463500621,-0.5882115016,-0.8495126405<br/> C,0,1.2284688472,2.801782702,-0.0755595167<br/> C,0,0.85607804,-1.3174674042,1.5318522547<br/> C,0,1.4405288706,1.4224189188,-0.1267228062<br/> H,0,2.9263808215,0.807552226,2.7642821693<br/> O,0,-1.9677510234,-1.3074722359,2.6304944216<br/> O,0,-2.2370938752,-2.5986789206,0.7968883197<br/> H,0,2.6250324255,3.2871108782,3.0037966509<br/> C,0,-3.4729197027,-3.0536133102,1.3609797691<br/> H,0,1.5109634442,4.5496935784,1.1505761228<br/> H,0,3.0254772324,-1.0473632472,1.2866392311<br/> C,0,0.5703078587,3.5016128703,-1.23685039<br/> H,0,1.1252363433,0.8183178324,-0.9684517779<br/> H,0,-4.1591657524,-2.2159511005,1.5154790049<br/> H,0,-3.3050338036,-3.550277192,2.3214216373<br/> H,0,-3.885765635,-3.7561573026,0.6358188256<br/> H,0,1.8603980946,-2.662717134,2.9071587283<br/> H,0,0.1969214101,-2.2341533185,3.3776575464<br/> H,0,1.5037527113,-1.0777657886,3.5955060773<br/> H,0,1.3031316993,4.1046959411,-1.7871964512<br/> H,0,-0.216430223,4.1779104349,-0.8857488411<br/> H,0,0.129286102,2.7799548248,-1.9308274313<br/> H,0,2.0921228894,-0.9968775485,-0.2273746852</p> <p><math>\nu_i = -38.2624 \text{ cm}^{-1}</math><br/> G = -4883.337616</p>  | <p><b>IXb-ortho</b></p> <p>C,0,0.7483282366,0.2019629559,2.8608565782<br/> N,0,1.3036619282,1.0156452953,1.7912200473<br/> C,0,-0.3798722604,-1.1560575761,1.0927588314<br/> C,0,2.6327396911,0.9727477659,1.5076905239<br/> C,0,-1.1494048779,-2.3444309769,0.6465205161<br/> C,0,-0.2380828075,-2.0149455398,3.5001072178<br/> C,0,3.150589809,1.6982576414,0.4657386414<br/> C,0,2.2851799181,2.5347373902,-0.2788208417<br/> Br,0,-0.3559259796,0.3871859111,-2.5997619831<br/> Cu,0,-0.1735424383,0.0332980177,-0.3698085291<br/> C,0,0.9241008973,2.5117514155,-0.0677032461<br/> C,0,0.0086839154,-1.0456392616,2.3681920234<br/> C,0,0.3975090333,1.541602672,0.8663573462<br/> H,0,3.2432332481,0.3810516819,2.1797790833<br/> O,0,-0.965803043,-3.5112539318,0.9412785709<br/> O,0,-2.1219950177,-1.9542580656,-0.2218659984<br/> H,0,4.2175625251,1.6805693885,0.2784308786<br/> C,0,-2.9036801785,-3.0087806957,-0.8011309928<br/> H,0,2.7030452468,3.2204750167,-1.0103625428<br/> H,0,0.0611448442,0.8275195122,3.4487832238<br/> C,0,-0.0135927333,3.4251903415,-0.8051669404<br/> H,0,-0.5694866691,1.7681092346,1.3129528116<br/> H,0,-3.4638540898,-3.5430461285,-0.0281826668<br/> H,0,-2.2584242033,-3.7173093024,-1.326957768<br/> H,0,-3.5822595437,-2.5182138794,-1.4989716443<br/> H,0,0.7109036319,-2.4397055094,3.8570754308<br/> H,0,-0.8736383535,-2.8438877116,3.1909236006<br/> H,0,-0.6980906128,-1.5042118261,4.3588898629<br/> H,0,-0.4446674522,2.9007721532,-1.6676774682<br/> H,0,0.5167927381,4.309196751,-1.1711320101<br/> H,0,-0.8382509491,3.7576117252,-0.1640166718<br/> H,0,1.5678887623,-0.0798783888,3.5303437789</p> <p>G = -4883.353763</p> |
| <p><b>TS8_b-ortho</b></p> <p>C,0,3.051566847,0.2751547977,-0.4946300461<br/> N,0,2.3156553046,1.2753514524,0.2755085576<br/> C,0,0.9464391318,-0.8633093133,-0.0964872818<br/> C,0,1.8244573441,2.38408554,-0.412314819<br/> C,0,0.0741390562,-2.0015241054,0.264171478<br/> C,0,2.7187899386,-2.0615746431,-1.5046524448<br/> C,0,0.6817433316,3.0135603008,-0.0522587254<br/> C,0,-0.0777879539,2.5344955414,1.0888372124<br/> Br,0,-2.3735794294,0.336919689,-1.070717739<br/> Cu,0,-0.4771801405,0.5547664873,0.1404469379<br/> C,0,0.3708160119,1.439930567,1.8021514662<br/> C,0,2.1238033661,-0.9166737592,-0.73607373<br/> C,0,1.4096648566,0.6161258101,1.1593105907<br/> H,0,2.4531433254,2.7371505192,-1.222039504<br/> O,0,-0.3547694791,-2.1536092793,1.3980755057<br/> O,0,-0.2113262996,-2.8272341137,-0.7570712152<br/> H,0,0.3496399596,3.8888424923,-0.5968376928<br/> C,0,-1.1808322759,-3.8544380585,-0.4674968898<br/> H,0,-0.8890012156,3.1419483972,1.4773140246<br/> H,0,3.9164665944,-0.0825061601,0.0861769912<br/> C,0,-0.178565489,0.9997429156,3.1342896757<br/> H,0,1.9030397651,-0.065078118,1.84722188<br/> H,0,-2.1245102082,-3.3970535532,-0.1623013799<br/> H,0,-0.8187940257,-4.5134016915,0.3256614361<br/> H,0,-1.304317831,-4.403301486,-1.4011048118<br/> H,0,2.8920499802,-1.7669724323,-2.5488438103<br/> H,0,2.0650393584,-2.9339241753,-1.5077448826<br/> H,0,3.697432083,-2.3449313921,-1.0911109792<br/> H,0,-0.3401337428,-0.083240112,3.1583060357<br/> H,0,-1.127892574,1.4978059386,3.3513249396<br/> H,0,0.5302715745,1.2502213611,3.9355108075<br/> H,0,3.4448451665,0.7199093836,-1.415046532</p> <p><math>\nu_i = -217.1828 \text{ cm}^{-1}</math><br/> G = -4883.325494</p> | <p><b>Xb-ortho</b></p> <p>C,0,2.8108164886,-1.9243633992,0.8164027488<br/> N,0,2.7183344198,-0.460165269,0.8051648214<br/> C,0,0.555338947,-1.3866276121,1.0340096482<br/> C,0,2.9878415577,0.1615112077,-0.4216478446<br/> C,0,-0.909977528,-1.3322110781,0.9985671235<br/> C,0,1.0696376481,-3.8188450862,0.3125481823<br/> C,0,2.3671731426,1.2756527404,-0.8527748785<br/> C,0,1.3270332023,1.8963919087,-0.0308177433<br/> Br,0,-1.642776854,1.3861413982,-2.2126758709<br/> Cu,0,-0.4683639316,1.1054991307,-0.3005455589<br/> C,0,0.8715425723,1.2407608484,1.1224573051<br/> C,0,1.3687936856,-2.4124984504,0.7175002099<br/> C,0,1.4115076332,-0.1531371132,1.4300812168<br/> H,0,3.8000555005,-0.2940193073,-0.9811053228<br/> O,0,-1.5375793266,-0.2947540039,0.7574193757<br/> O,0,-1.5381314023,-2.4825749498,1.2485993273<br/> H,0,2.6617454279,1.7331015547,-1.7896410896<br/> C,0,-2.9799876255,-2.4561313925,1.1212028834<br/> H,0,1.21949486,2.9780917973,-0.0960556<br/> H,0,3.2560904081,-2.2762219374,1.761206085<br/> C,0,0.3109245014,2.0050392872,2.3021149504<br/> H,0,1.5529460394,-0.2157748588,2.5214498339<br/> H,0,-3.2646717809,-2.0936076079,0.1314569167<br/> H,0,-3.4111747422,-1.8044933399,1.8842935862<br/> H,0,-3.2957931063,-3.4880744805,1.2703437667<br/> H,0,1.5241661691,-4.0384473896,-0.6623685373<br/> H,0,-0.0002317276,-4.019356826,0.261302019<br/> H,0,1.5167789368,-4.5204258183,1.0304655451<br/> H,0,-0.5185115341,1.4712310818,2.7812243428<br/> H,0,-0.0593457759,2.9898084931,1.9987542253<br/> H,0,1.0881292788,2.1612042261,3.0647211002<br/> H,0,3.4435454961,-2.2909019667,0.0012636308</p> <p>G = -4883.362637</p>             |

Stationary points located at Becke3LYP/6-31G(d) level of theory for the para reaction path:

|                                                                                                                                                                                                                                                                                                                                                                                                                                                                                                                                                                                                                                                                                                                                                                                                                                                                                                                                                                                                                                                                                                                                                                                                                                                                                                                                                                                                                                                                                                                                                                                                                                                                                                                                                                                                                                                                                                                                                                                                                                                                           |                                                                                                                                                                                                                                                                                                                                                                                                                                                                                                                                                                                                                                                                                                                                                                                                                                                                                                                                                                                                                                                                                                                                                                                                                                                                                                                                                                                                                                                                                                                                                                                                                                                                                                                                                                                                                                                                                                                                                                                                                                    |
|---------------------------------------------------------------------------------------------------------------------------------------------------------------------------------------------------------------------------------------------------------------------------------------------------------------------------------------------------------------------------------------------------------------------------------------------------------------------------------------------------------------------------------------------------------------------------------------------------------------------------------------------------------------------------------------------------------------------------------------------------------------------------------------------------------------------------------------------------------------------------------------------------------------------------------------------------------------------------------------------------------------------------------------------------------------------------------------------------------------------------------------------------------------------------------------------------------------------------------------------------------------------------------------------------------------------------------------------------------------------------------------------------------------------------------------------------------------------------------------------------------------------------------------------------------------------------------------------------------------------------------------------------------------------------------------------------------------------------------------------------------------------------------------------------------------------------------------------------------------------------------------------------------------------------------------------------------------------------------------------------------------------------------------------------------------------------|------------------------------------------------------------------------------------------------------------------------------------------------------------------------------------------------------------------------------------------------------------------------------------------------------------------------------------------------------------------------------------------------------------------------------------------------------------------------------------------------------------------------------------------------------------------------------------------------------------------------------------------------------------------------------------------------------------------------------------------------------------------------------------------------------------------------------------------------------------------------------------------------------------------------------------------------------------------------------------------------------------------------------------------------------------------------------------------------------------------------------------------------------------------------------------------------------------------------------------------------------------------------------------------------------------------------------------------------------------------------------------------------------------------------------------------------------------------------------------------------------------------------------------------------------------------------------------------------------------------------------------------------------------------------------------------------------------------------------------------------------------------------------------------------------------------------------------------------------------------------------------------------------------------------------------------------------------------------------------------------------------------------------------|
| <p><b>TS7_b-para</b></p> <p>C,0,1.9037625696,-0.7496290157,0.6601067023<br/>           N,0,1.9080295545,0.7538053022,0.6892284081<br/>           C,0,-0.5024960705,-1.2001970142,0.6543338199<br/>           C,0,1.3373632698,1.4115101359,-0.3429875157<br/>           C,0,-1.7607482711,-1.600681324,1.3207136059<br/>           C,0,0.8641026362,-1.7902810743,2.7552835125<br/>           C,0,1.1623048594,2.7895039036,-0.2736968682<br/>           C,0,1.5720843111,3.4770739646,0.8584881342<br/>           Br,0,-0.5359447232,0.0738170984,-3.213068805<br/>           Cu,0,-0.6441415137,-0.5880187994,-1.0914930381<br/>           C,0,2.1627871847,2.7844182871,1.9349692634<br/>           C,0,0.6525613293,-1.2792441388,1.3476624509<br/>           C,0,2.3069806588,1.4137951651,1.8049478238<br/>           H,0,1.0319296289,0.8177389919,-1.1961212752<br/>           O,0,-2.1998417185,-1.163971181,2.3723453076<br/>           O,0,-2.4479800792,-2.5092523241,0.5747462914<br/>           H,0,0.7030458959,3.2926895296,-1.1172574577<br/>           C,0,-3.7070855385,-2.9214504396,1.1196645383<br/>           H,0,1.4447649937,4.5545398149,0.919557603<br/>           H,0,2.8343623356,-1.0740953099,1.1340299814<br/>           C,0,2.6196560541,3.497276933,3.1819161924<br/>           H,0,2.7419451343,0.7994711035,2.584204598<br/>           H,0,-4.3813727744,-2.0666474399,1.2254783224<br/>           H,0,-3.5750322364,-3.38677153,2.1011835387<br/>           H,0,-4.1132842095,-3.6416325689,0.4081674314<br/>           H,0,1.582186845,-2.6231044603,2.7764393861<br/>           H,0,-0.0733397891,-2.1234694652,3.2024299442<br/>           H,0,1.2703712533,-1.0095248647,3.4176617548<br/>           H,0,1.7749470257,3.9821662016,3.684514574<br/>           H,0,3.3510452332,4.2778534929,2.9430711536<br/>           H,0,3.081700361,2.8073460914,3.8934500188<br/>           H,0,1.9236290549,-1.0210342194,-0.3958449002</p> <p><math>v_i = -48.8947 \text{ cm}^{-1}</math><br/> <math>G = -4883.335297</math></p>          | <p><b>IXb-para</b></p> <p>C,0,2.2738170392,-1.6066734489,0.0010873425<br/>           N,0,2.2502274831,-0.2239481499,0.4556477108<br/>           C,0,-0.212254563,-1.5196134571,0.0339790311<br/>           C,0,1.5810512219,0.6890958561,-0.3516877931<br/>           C,0,-1.5570159703,-2.1262974591,0.1527992634<br/>           C,0,0.9928874932,-3.772378442,0.2423778579<br/>           C,0,1.5537351866,2.0402266127,0.1371194163<br/>           C,0,1.8593736373,2.3188744965,1.4397990744<br/>           Br,0,-1.3048394522,2.0353038128,-1.6550758438<br/>           Cu,0,-0.4077111785,0.2860540627,-0.5210339235<br/>           C,0,2.2634969938,1.2775791655,2.3300439679<br/>           C,0,0.8937429111,-2.2725856228,0.1046263049<br/>           C,0,2.4421743001,0.0321930951,1.7875441329<br/>           H,0,1.7605532429,0.5325049644,-1.4151472017<br/>           O,0,-1.9168893021,-3.0887092755,0.8040627025<br/>           O,0,-2.4307327011,-1.3756913459,-0.5831687276<br/>           H,0,1.2125712355,2.8095642872,-0.5397963741<br/>           C,0,-3.8038311461,-1.7906016392,-0.563763764<br/>           H,0,1.7984205742,3.3402946083,1.8057035816<br/>           H,0,3.0077452274,-2.1511758928,0.6037276881<br/>           C,0,2.5253077771,1.5484954579,3.917878611385<br/>           H,0,2.7833509674,-0.8111823042,2.3777176081<br/>           H,0,-4.1897660342,-1.789418631,0.4593391169<br/>           H,0,-3.9061714489,-2.796362166,-0.9811920352<br/>           H,0,-4.3359966712,-1.0638542323,1.1773696102<br/>           H,0,1.6423582694,-4.1912956986,-0.5400379851<br/>           H,0,0.0145538586,-4.2487093206,0.1926377638<br/>           H,0,1.4490023538,-4.0419695116,1.2059589188<br/>           H,0,1.6169877451,1.8976991872,4.2937566354<br/>           H,0,3.2860972413,2.3287593828,3.9156667755<br/>           H,0,2.8728867169,0.6510590363,4.3085744901<br/>           H,0,2.6348860862,-1.6241606419,-1.0358026706</p> <p><math>G = -4883.354074</math></p>           |
| <p><b>TS8_b-para</b></p> <p>C,0,2.2950556521,-2.0118794372,0.293012942<br/>           N,0,2.5022140807,-0.573331988,0.1437004072<br/>           C,0,0.1522225758,-1.3141049613,-0.6086493516<br/>           C,0,1.713059784,-0.0958732218,-0.9419013081<br/>           C,0,-1.0857040684,-1.4797343807,-1.406082055<br/>           C,0,0.4490662672,-3.7767662232,0.0305215165<br/>           C,0,1.5369162008,1.3541540335,-1.0229090085<br/>           C,0,1.5183176511,2.0738348511,0.1550060977<br/>           Br,0,-2.0139355576,1.1101324376,1.0867914175<br/>           Cu,0,-0.1154761346,0.6400434121,-0.0597792795<br/>           C,0,2.0250609764,1.4663458063,1.3819059597<br/>           C,0,0.8508580327,-2.3357035351,-0.0869333989<br/>           C,0,2.48182238,0.1915048515,1.3170341445<br/>           H,0,1.9487047057,-0.5696778463,-1.890208797<br/>           O,0,-1.8864305356,-2.3902371667,-1.3744457835<br/>           O,0,-1.2155225788,-0.4086729422,-2.2434686722<br/>           H,0,1.302250288,1.8025041075,-1.9827307977<br/>           C,0,-2.4391408878,-0.3596430476,-2.9997254191<br/>           H,0,1.3147781482,3.1399433923,0.1437855161<br/>           H,0,2.5611966666,-2.3304530298,1.3062810997<br/>           C,0,2.0328822552,2.2613543288,2.6582132198<br/>           H,0,2.9196212718,-0.2990457003,2.1800203085<br/>           H,0,-3.2898844655,-0.2640935225,-2.3208833014<br/>           H,0,-2.5521218697,-1.2626152245,-3.604400438<br/>           H,0,-2.3543092621,0.5228694759,-3.6339954422<br/>           H,0,1.2358558475,-4.4359145642,-0.3624118379<br/>           H,0,-0.4909394876,-3.9736743076,-0.484699368<br/>           H,0,0.316617114,-4.0401514296,1.0893252956<br/>           H,0,1.0099226188,2.530806636,2.9485688277<br/>           H,0,2.6009398579,3.1941347523,2.5467986658<br/>           H,0,2.4774107951,1.692181554,3.4803778861<br/>           H,0,2.954135626,-2.5590381579,-0.3994753642</p> <p><math>v_i = -227.7751 \text{ cm}^{-1}</math><br/> <math>G = -4883.325273</math></p> | <p><b>Xb-para</b></p> <p>C,0,2.7086760741,-2.0809173623,-0.9460108401<br/>           N,0,2.6281069827,-0.6146779834,-0.9472474831<br/>           C,0,0.4601656115,-1.5197062048,-1.2230415685<br/>           C,0,1.337342435,-0.2988405886,-1.602737942<br/>           C,0,-1.0112276418,-1.6001945311,-1.2980906847<br/>           C,0,0.9269061573,-3.9642181358,-0.5409430662<br/>           C,0,0.8380118425,1.0959729745,-1.2836754463<br/>           C,0,1.2948165023,1.7637581599,-0.1438266033<br/>           Br,0,-1.9263466775,1.3451552805,1.8350539107<br/>           Cu,0,-0.5158958213,1.0136737986,0.1159638067<br/>           C,0,2.3140588305,1.1494824319,0.7131918274<br/>           C,0,1.2619581624,-2.5523758392,-0.8940204901<br/>           C,0,2.8978619771,0.0129961951,0.2742892178<br/>           H,0,1.499359428,-0.3569590472,-2.6905118968<br/>           O,0,-1.6759055027,-2.5980036145,-1.4695809347<br/>           O,0,-1.6026091166,-0.3676782515,-1.1188230546<br/>           H,0,0.4306289319,1.6667221138,-2.1152672976<br/>           C,0,-3.0547450585,-0.3599056061,-1.1368800544<br/>           H,0,1.1891943449,2.846742394,-0.0875878363<br/>           H,0,3.3121119231,-2.4470142946,-0.1089124922<br/>           C,0,2.7054606519,1.8185901688,2.0025626978<br/>           H,0,3.6988552451,-0.4560195089,0.8402307636<br/>           H,0,-3.4357399485,-0.9275074669,-0.2876663925<br/>           H,0,-3.4052383838,-0.7931202556,-2.0745982385<br/>           H,0,-3.3323105871,0.6881016727,-1.0462224393<br/>           H,0,1.3825450579,-4.6500887053,-1.2688815571<br/>           H,0,-0.1486051248,-4.1392314467,-0.5352443098<br/>           H,0,1.3485189127,-4.2241179551,0.4389655874<br/>           H,0,1.8513796233,1.884026455,2.6884697938<br/>           H,0,3.0611412719,2.8447079209,1.8337213864<br/>           H,0,3.5051098357,1.2692111087,2.5103644399<br/>           H,0,3.1818168086,-2.4420771242,-1.8736347674</p> <p><math>G = -4883.358768</math></p> |

**VI.- Cartesian coordinates and Gibbs free energies of the stationary points for conjugate addition of 3-nitropyridine (1c) to carbene intermediate VII, intramolecular cyclization and reductive elimination steps.**

*Stationary points located at Becke3LYP/6-31G(d) level of theory for the ortho reaction path:*

| <i>TS6_c</i>                                   | <i>VIIIc</i>                                   |
|------------------------------------------------|------------------------------------------------|
| C,0,1.4754453835,-1.2984834443,0.1506694613    | C,0,1.3565251569,-0.8664391182,0.4784724914    |
| N,0,1.6986624492,0.7554181606,0.1353627077     | N,0,1.4532555882,0.6491354213,0.509404511      |
| C,0,-0.8188996487,-1.7205297711,0.6498591591   | C,0,-1.000537123,-1.5109865486,0.4518964355    |
| C,0,-1.8553734473,-2.0876026258,1.6383405659   | C,0,-2.2623104922,-1.8820491727,1.1319336103   |
| C,0,0.6124506061,1.3838799734,-0.3294339417    | C,0,0.6252854617,1.3340038792,-0.3176942032    |
| C,0,0.9166645974,-1.9620372612,2.525821517     | C,0,0.2672609115,-1.4950157646,2.6977912309    |
| Br,0,-1.8114704909,-0.2316556306,-2.9446074189 | Br,0,-0.5301441289,-0.4187908922,-3.3981022319 |
| Cu,0,-1.3905198382,-1.1149196698,-0.9697522545 | Cu,0,-1.0280618275,-1.160961287,-1.3721114618  |
| C,0,0.5299335037,-2.7733523263,-0.3764975876   | C,0,0.5983052343,2.7192779619,-0.2997351715    |
| C,0,0.5025698103,-1.6773533237,1.0945425856    | C,0,0.1124699821,-1.3331337514,1.2032495705    |
| C,0,1.6049135181,3.5251068602,0.0898658111     | C,0,1.4199365178,3.4140113301,0.5850004358     |
| O,0,-2.4021062771,-1.267413449,2.3541202609    | O,0,-2.8322372143,-1.2355492285,1.9955742657   |
| O,0,-2.165437411,-3.3998816914,1.6189784146    | O,0,-2.7788052599,-3.0308732948,0.6237318925   |
| C,0,-3.242216316,-3.7906401759,2.4912192166    | C,0,-4.0326051229,-3.4400261539,1.18654465     |
| H,0,2.5325634881,-1.4635500961,0.3434923643    | H,0,2.2945942933,-1.2316969156,0.9060349154    |
| C,0,2.716385457,2.8388983508,0.5744597313      | C,0,2.2483503034,2.6693712078,1.4228762981     |
| H,0,1.181098295,-1.2599046285,-0.8929490016    | H,0,1.2984465139,-1.1161671025,-0.5817007987   |
| C,0,2.7465441321,1.447721983,0.5834899301      | C,0,2.2639289226,1.2852484902,1.374041989      |
| H,0,-4.1597163051,-3.2591681017,2.2257253316   | H,0,-4.8006391714,-2.6817997459,1.0092983444   |
| H,0,-0.1909293599,0.7295338921,-0.6636225841   | H,0,-0.0080846217,0.7029492238,-0.9407485738   |
| H,0,-2.9930566878,-3.5741539228,3.5333282628   | H,0,-3.9423740244,-3.6031891391,2.2645126334   |
| H,0,-3.3630270095,-4.8633889585,2.3399799287   | H,0,-4.2910865651,-4.3708168013,0.6801968076   |
| H,0,0.5716140574,-1.1707160224,3.2026449879    | H,0,0.6275768819,-0.5673595451,3.1712286969    |
| H,0,-0.3615765981,3.2456790425,-0.7735987756   | H,0,-0.0646039381,3.2364913265,-0.9837360061   |
| H,0,2.003954335,-2.0435136297,2.6275719019     | H,0,0.9989304863,-2.2775460791,2.9460155788    |
| H,0,0.4770258955,-2.9013666454,2.8792596303    | H,0,-0.6838693037,-1.7402977534,3.1724552924   |
| H,0,1.6015529775,4.608799076,0.0872231411      | H,0,1.4357065309,4.496240607,0.6381795577      |
| N,0,3.8796844473,3.5834877059,1.0839680961     | N,0,3.1436984037,3.3449259092,2.3769633492     |
| H,0,3.6108942107,0.9047156917,0.9499550758     | H,0,2.9119816566,0.691182306,2.0045920333      |
| O,0,4.8289700107,2.9235436017,1.5005607373     | O,0,3.8518896223,2.6288505033,3.0801422724     |
| O,0,3.8182250948,4.8089307114,1.0558068949     | O,0,3.1133931416,4.5705176073,2.3940069423     |
| $\nu_i = -160.9056 \text{ cm}^{-1}$            | G = -5048.533465                               |
| G = -5048.522746                               |                                                |

|                                                                                                                                                                                                                                                                                                                                                                                                                                                                                                                                                                                                                                                                                                                                                                                                                                                                                                                                                                                                                                                                                                                                                                                                                                                                                                                                                                                                                                                                                                                                                                                                                                                                                                       |                                                                                                                                                                                                                                                                                                                                                                                                                                                                                                                                                                                                                                                                                                                                                                                                                                                                                                                                                                                                                                                                                                                                                                                                                                                                                                                                                                                                                                                                                                                                                                                                                                                   |
|-------------------------------------------------------------------------------------------------------------------------------------------------------------------------------------------------------------------------------------------------------------------------------------------------------------------------------------------------------------------------------------------------------------------------------------------------------------------------------------------------------------------------------------------------------------------------------------------------------------------------------------------------------------------------------------------------------------------------------------------------------------------------------------------------------------------------------------------------------------------------------------------------------------------------------------------------------------------------------------------------------------------------------------------------------------------------------------------------------------------------------------------------------------------------------------------------------------------------------------------------------------------------------------------------------------------------------------------------------------------------------------------------------------------------------------------------------------------------------------------------------------------------------------------------------------------------------------------------------------------------------------------------------------------------------------------------------|---------------------------------------------------------------------------------------------------------------------------------------------------------------------------------------------------------------------------------------------------------------------------------------------------------------------------------------------------------------------------------------------------------------------------------------------------------------------------------------------------------------------------------------------------------------------------------------------------------------------------------------------------------------------------------------------------------------------------------------------------------------------------------------------------------------------------------------------------------------------------------------------------------------------------------------------------------------------------------------------------------------------------------------------------------------------------------------------------------------------------------------------------------------------------------------------------------------------------------------------------------------------------------------------------------------------------------------------------------------------------------------------------------------------------------------------------------------------------------------------------------------------------------------------------------------------------------------------------------------------------------------------------|
| <p><b>TS7_c-ortho</b></p> <p>C,0,0.0284701034,-1.0723491892,-2.0125620692<br/> N,0,1.3011704642,-1.2632274731,-1.2328439591<br/> C,0,-1.517600395,-0.8058422404,-0.1502940741<br/> C,0,1.7078643321,-0.2660930687,-0.4038014185<br/> C,0,-2.5400650756,-1.2817592151,0.8050314303<br/> C,0,-1.6386955086,-2.9714732419,-1.5427201431<br/> C,0,2.7366837733,-0.5389712942,0.4970476741<br/> C,0,3.3385548635,-1.7838423536,0.5686557892<br/> Br,0,-0.285242627,2.9763462668,-0.6922240839<br/> Cu,0,-0.8805517038,0.9366631382,-0.0431650587<br/> C,0,2.8985923112,-2.7792664879,-0.3115678449<br/> C,0,-1.1260654721,-1.6010034843,-1.167274006<br/> C,0,1.87681413,-2.4889713342,-1.1934893071<br/> H,0,1.2587062318,0.7146860323,-0.5190707927<br/> O,0,-2.5405469129,-2.3503164476,1.3938592412<br/> O,0,-3.491874226,-0.3355919094,1.0171334317<br/> N,0,3.2012572946,0.536218665,1.3908423082<br/> C,0,-4.5096756168,-0.6865321449,1.9643812644<br/> H,0,4.1345084273,-1.9519027604,1.2841346514<br/> H,0,0.1611937179,-1.5935911976,-2.9642009428<br/> H,0,3.3425155942,-3.7675594619,-0.3117965961<br/> H,0,1.479406615,-3.217173197,-1.889339204<br/> H,0,-4.0720638089,-0.8699775801,2.9497991863<br/> H,0,-5.0461643392,-1.5846708282,1.6446808146<br/> H,0,-5.1845061185,0.1693440587,1.9991976412<br/> H,0,-1.994360398,-2.9941952752,-2.5825907867<br/> H,0,-2.4501639457,-3.2820939837,-0.8835471744<br/> H,0,-0.8545894739,-3.7410656727,-1.4608321069<br/> H,0,-0.0555359546,0.0005733667,-2.1889226916<br/> O,0,4.1268360394,0.263490927,2.1536153807<br/> O,0,2.6248708273,1.6134051971,1.3071726246</p> <p><math>\nu_i = -44.1306 \text{ cm}^{-1}</math><br/> G = -5048.525664</p> | <p><b>IXc-ortho</b></p> <p>C,0,2.3211817583,-1.9680207799,0.2103089431<br/> N,0,2.324147936,-0.5115660787,0.2081572541<br/> C,0,-0.1805830608,-1.8458160451,0.2127711511<br/> C,0,1.4138927483,0.0956996416,-0.6821102581<br/> C,0,-1.5431196629,-2.4417058353,0.1739335136<br/> C,0,1.0145005652,-4.0854815625,0.5148859485<br/> C,0,1.5647412358,1.5330653525,-0.7751238773<br/> C,0,2.2472517462,2.2621823292,0.1628754849<br/> Br,0,-1.546229054,1.8194312155,0.8737600303<br/> Cu,0,-0.3882691559,0.0347419928,0.1062756229<br/> C,0,2.8868211045,1.578165478,1.2182982678<br/> C,0,0.9255065682,-2.5896151871,0.3284450818<br/> C,0,2.9173993966,0.2015684301,1.1936182809<br/> H,0,1.3005043763,-0.4301340337,-1.6243180614<br/> O,0,-1.9332844078,-3.4903305736,0.6482524979<br/> O,0,-2.3613101553,-1.5825247197,-0.4899785316<br/> N,0,0.9349829417,2.1880279525,-1.9025157377<br/> C,0,-3.7470757248,-1.9553312144,-0.5758649022<br/> H,0,2.280770791,3.3415895254,0.0755268525<br/> H,0,2.9680107454,-2.3122332779,1.0243139224<br/> H,0,3.3983692374,2.1127037531,2.0084106449<br/> H,0,3.4576039958,-0.3778891424,1.9342048267<br/> H,0,-4.1617961522,-2.1015278543,0.4244681002<br/> H,0,-3.8576115062,-2.8783458676,-1.151318446<br/> H,0,-4.238491601,-1.1236494595,-1.0794848328<br/> H,0,1.7218359058,-4.5248862448,-0.2026632133<br/> H,0,0.0406540419,-4.560449401,0.4072725672<br/> H,0,1.3934539517,-4.3211893189,1.5193621881<br/> H,0,2.7769022166,-2.3170225475,-0.7279444342<br/> O,0,1.0947451277,3.3998237279,-2.0377786413<br/> O,0,0.2699244623,1.4682724123,-2.6583879072</p> <p>G = -5048.557822</p>             |
| <p><b>TS8_c-ortho</b></p> <p>C,0,2.5969328798,-2.060093705,0.9393386432<br/> N,0,2.3085278168,-0.6402079543,0.8963684416<br/> C,0,0.1707577896,-2.2686416662,0.4919727236<br/> C,0,2.8391991126,0.14045474,-0.1143638772<br/> C,0,-1.0853541454,-1.707380451,0.6341415394<br/> C,0,1.6777403549,-4.1303512038,-0.2907668804<br/> C,0,2.268599066,1.3109894443,-0.5003107128<br/> C,0,1.0122068249,1.7299533044,0.0634452669<br/> Br,0,-0.7064599676,1.5569341078,-2.7474659464<br/> Cu,0,-0.4544662485,0.6738795151,-0.6909161921<br/> C,0,0.4667759431,0.8964695125,1.089039435<br/> C,0,1.3580927773,-2.8001718394,0.359800809<br/> C,0,1.0960338609,-0.3343688943,1.4663410241<br/> H,0,3.7597123228,-0.2329254336,-0.5466323189<br/> O,0,-1.5688380184,-0.7801865536,-0.0861121706<br/> O,0,-1.8102857545,-2.2113980557,1.6555733608<br/> H,0,2.7372468096,1.9107990418,-1.2704688131<br/> C,0,-3.0347158718,-1.5250917315,1.9753833196<br/> H,0,0.7204629843,2.7730076312,0.0254477044<br/> H,0,2.7634069599,-2.3800413168,1.9752006417<br/> N,0,-0.4793226009,1.4736099051,2.040748779<br/> H,0,0.8776769238,-0.7674456722,2.4322056307<br/> H,0,-3.69919099,-1.4929561078,1.1092104831<br/> H,0,-2.8239715683,-0.5093663954,2.3205453348<br/> H,0,-3.4815501187,-2.1107510843,2.7795842874<br/> H,0,2.3309312732,-3.9930621922,-1.1630528896<br/> H,0,0.7689387936,-4.6401143502,-0.615109693<br/> H,0,2.210660128,-4.7882085764,0.4096833418<br/> O,0,-0.8028100769,0.7800261574,3.010234648<br/> O,0,-0.9138015374,2.6019055715,1.8113427564<br/> H,0,3.5051315899,-2.2713309282,0.3690069401</p> <p><math>\nu_i = -226.2486 \text{ cm}^{-1}</math><br/> G = -5048.519664</p>                | <p><b>Xc-ortho</b></p> <p>C,0,-2.7543531347,-1.704381687,-1.3468737917<br/> N,0,-1.5704730468,-2.1929236951,-0.6277566658<br/> C,0,-1.8900852885,0.0852672823,-0.1281677053<br/> C,0,-0.4848440359,-2.6319144624,-1.3656849531<br/> C,0,-1.4114160092,1.3945509757,0.3398673259<br/> C,0,-3.5503109488,0.7168434746,-1.9959629796<br/> C,0,0.806693734,-2.5031065435,-0.9771717868<br/> C,0,1.131106427,-1.8204481496,0.2613145427<br/> Br,0,2.8502968259,0.9556221464,-1.1115625852<br/> Cu,0,1.1253059575,0.1606272706,0.0878511174<br/> C,0,0.0781287093,-1.2245318264,0.9831437804<br/> C,0,-2.7323909251,-0.1917875905,-1.1371563687<br/> C,0,-1.3442801226,-1.229160526,0.4715130877<br/> H,0,-0.7495623135,-3.1631345336,-2.2753921224<br/> O,0,-0.2152735078,1.6186037075,0.5654828062<br/> O,0,-2.3417114148,2.3274300829,0.4929463817<br/> H,0,1.5996385734,-2.9230571937,-1.5824818084<br/> C,0,-1.8769355358,3.6309106294,0.9261442071<br/> H,0,2.0405818131,-2.0811699572,0.793020066<br/> H,0,-3.6737137442,-2.1309429495,-0.9163042436<br/> N,0,0.2051331852,-1.0389892599,2.4202441414<br/> H,0,-1.9992052435,-1.4927897742,1.3110292643<br/> H,0,-1.1498967892,4.026581374,0.2141456348<br/> H,0,-1.4176448631,3.5496406878,1.9131034336<br/> H,0,-2.7716068297,4.2507669196,0.9619206222<br/> H,0,-3.2717460339,0.6054850438,-3.0518804866<br/> H,0,-3.4405653352,1.7635492994,-1.7085601763<br/> H,0,-4.6137480261,0.4526714877,-1.9208516511<br/> O,0,-0.7811211016,-0.5731347159,3.0102787127<br/> O,0,1.2759691585,-1.3083238875,2.9674831361<br/> H,0,-2.720196144,-1.9892266456,-2.4034732268</p> <p>G = -5048.578385</p> |

Stationary points located at Becke3LYP/6-31G(d) level of theory for the para reaction

path:

| TS7_c-para                                                                                                                                                                                                                                                                                                                                                                                                                                                                                                                                                                                                                                                                                                                                                                                                                                                                                                                                                                                                                                                                                                                                                                                                                                                                                                                                                                                                                                                                                                                                                                                                                                                                                                                                                                                                                                                                                                                                                                                                                                                                                                                                                                                                     | IXc-para                                                                                                                                                                                                                                                                                                                                                                                                                                                                                                                                                                                                                                                                                                                                                                                                                                                                                                                                                                                                                                                                                                                                                                                                                                                                                                                                                                                                                                                                                                                                                                                                                                                                                                                                                                                                                                                                                                                                                                                                                                                                                                                                                                                                                   |
|----------------------------------------------------------------------------------------------------------------------------------------------------------------------------------------------------------------------------------------------------------------------------------------------------------------------------------------------------------------------------------------------------------------------------------------------------------------------------------------------------------------------------------------------------------------------------------------------------------------------------------------------------------------------------------------------------------------------------------------------------------------------------------------------------------------------------------------------------------------------------------------------------------------------------------------------------------------------------------------------------------------------------------------------------------------------------------------------------------------------------------------------------------------------------------------------------------------------------------------------------------------------------------------------------------------------------------------------------------------------------------------------------------------------------------------------------------------------------------------------------------------------------------------------------------------------------------------------------------------------------------------------------------------------------------------------------------------------------------------------------------------------------------------------------------------------------------------------------------------------------------------------------------------------------------------------------------------------------------------------------------------------------------------------------------------------------------------------------------------------------------------------------------------------------------------------------------------|----------------------------------------------------------------------------------------------------------------------------------------------------------------------------------------------------------------------------------------------------------------------------------------------------------------------------------------------------------------------------------------------------------------------------------------------------------------------------------------------------------------------------------------------------------------------------------------------------------------------------------------------------------------------------------------------------------------------------------------------------------------------------------------------------------------------------------------------------------------------------------------------------------------------------------------------------------------------------------------------------------------------------------------------------------------------------------------------------------------------------------------------------------------------------------------------------------------------------------------------------------------------------------------------------------------------------------------------------------------------------------------------------------------------------------------------------------------------------------------------------------------------------------------------------------------------------------------------------------------------------------------------------------------------------------------------------------------------------------------------------------------------------------------------------------------------------------------------------------------------------------------------------------------------------------------------------------------------------------------------------------------------------------------------------------------------------------------------------------------------------------------------------------------------------------------------------------------------------|
| <p>C,0,1.5737125817,-0.9138030284,0.4279566067<br/>                     N,0,1.5917611829,0.5963809238,0.4589746829<br/>                     C,0,-0.8024725676,-1.4606454881,0.4194312896<br/>                     C,0,0.9647541047,1.2645131042,-0.5450081862<br/>                     C,0,-2.0680401911,-1.8532191147,1.0802947888<br/>                     C,0,0.5291527919,-1.7698109623,2.6042270005<br/>                     C,0,0.8054028726,2.6435735745,-0.4807445499<br/>                     C,0,1.2993493326,3.3498093655,0.6087668318<br/>                     Br,0,-0.5417747313,-0.4472881049,-3.5017210772<br/>                     Cu,0,-0.8708115452,-1.0044754809,-1.3775740607<br/>                     C,0,1.9471984193,2.6232159132,1.6126875206<br/>                     C,0,0.3352334307,-1.4227953475,1.1464779011<br/>                     C,0,2.0854686669,1.2509811548,1.5287477783<br/>                     H,0,0.5806089934,0.6556830945,-1.3586570651<br/>                     O,0,-2.5397645365,-1.3641413096,2.0929921553<br/>                     O,0,-2.7120775587,-2.8173059129,0.3712395924<br/>                     H,0,0.30054681469,3.1436804702,-1.2993915754<br/>                     C,0,-3.9749230221,-3.2347244888,0.9079251853<br/>                     H,0,1.2102073495,4.4258873925,0.6967518281<br/>                     H,0,2.5171392498,-1.2408633517,0.8735264914<br/>                     N,0,2.5148536671,3.3102679517,2.7814286806<br/>                     H,0,2.5841052129,0.6744821097,2.2960812205<br/>                     H,0,-4.6721995591,-2.3933141361,0.9510658628<br/>                     H,0,-3.8539836586,-3.6434392886,1.9153737094<br/>                     H,0,-4.3433468955,-4.0021462823,0.2263114707<br/>                     H,0,1.2960354439,-2.546974415,2.7328088017<br/>                     H,0,-0.4017994438,-2.1130211014,3.0569195715<br/>                     H,0,0.8603651744,-0.8993791751,3.1926273372<br/>                     H,0,1.5494878311,-1.1767069724,-0.6295213934<br/>                     O,0,3.095504278,2.6160285899,3.6131542163<br/>                     O,0,2.3654928286,4.5269028887,2.8361881184</p> | <p>C,0,1.0018432858,-1.7819853422,-1.8060681054<br/>                     N,0,0.7060561762,-0.3574968955,-1.9023402895<br/>                     C,0,-0.0889143812,-1.6994344394,0.4145045293<br/>                     C,0,-0.3186516465,0.0419415468,-2.6892536362<br/>                     C,0,-0.8304543736,-2.2333398741,1.5803728068<br/>                     C,0,0.013886269,-3.9169289471,-0.8611831799<br/>                     C,0,-0.7340080836,1.3474922443,-2.6904304441<br/>                     C,0,-0.0757837322,2.3102549894,-1.8735701347<br/>                     Br,0,1.3341899747,1.6321963513,2.314845581<br/>                     Cu,0,0.468843199,0.0368652119,0.9466612536<br/>                     C,0,0.8854842492,1.8760434061,-1.011962154<br/>                     C,0,0.251433191,-2.4438924666,-0.6440318756<br/>                     C,0,1.1988801704,0.468463616,-0.8681991648<br/>                     H,0,-0.7729074575,-0.6926421955,-3.3415362795<br/>                     O,0,-1.4378557989,-3.2703673864,1.7382465466<br/>                     O,0,-0.7470033197,-1.2703510996,2.5537779748<br/>                     N,0,-1.7926417645,1.7378764951,-3.6009374258<br/>                     C,0,-1.3826759438,-1.5437460313,3.8151207138<br/>                     H,0,-0.3403154257,3.3560779689,-1.9664497543<br/>                     H,0,2.0859376078,-1.9042562123,-1.6824798585<br/>                     H,0,1.4054749946,2.5625053452,-0.3567699844<br/>                     H,0,2.2284565812,0.2201072556,-0.6079125176<br/>                     H,0,-0.9563840991,-2.4442923104,4.2641284598<br/>                     H,0,-2.4570939558,-1.6836316517,3.6717689226<br/>                     H,0,-1.1835325443,-0.6705149839,4.4351193042<br/>                     H,0,-0.6843325426,-4.0727565091,-1.6959114276<br/>                     H,0,-0.4029086471,-4.3907478183,0.0264215603<br/>                     H,0,0.9513331202,-4.4198528312,-1.1380008391<br/>                     H,0,0.7313876922,-2.2509540175,-2.756647357<br/>                     O,0,-2.1156773751,2.9267656568,-3.608673884<br/>                     O,0,-2.3017575211,0.8618434679,-4.307519893</p> |
| <p><math>\nu_i = -27.6436 \text{ cm}^{-1}</math><br/>                     G = -5048.530753</p>                                                                                                                                                                                                                                                                                                                                                                                                                                                                                                                                                                                                                                                                                                                                                                                                                                                                                                                                                                                                                                                                                                                                                                                                                                                                                                                                                                                                                                                                                                                                                                                                                                                                                                                                                                                                                                                                                                                                                                                                                                                                                                                 | <p>G = -5048.560054</p>                                                                                                                                                                                                                                                                                                                                                                                                                                                                                                                                                                                                                                                                                                                                                                                                                                                                                                                                                                                                                                                                                                                                                                                                                                                                                                                                                                                                                                                                                                                                                                                                                                                                                                                                                                                                                                                                                                                                                                                                                                                                                                                                                                                                    |
| TS8_c-para                                                                                                                                                                                                                                                                                                                                                                                                                                                                                                                                                                                                                                                                                                                                                                                                                                                                                                                                                                                                                                                                                                                                                                                                                                                                                                                                                                                                                                                                                                                                                                                                                                                                                                                                                                                                                                                                                                                                                                                                                                                                                                                                                                                                     | Xc-para                                                                                                                                                                                                                                                                                                                                                                                                                                                                                                                                                                                                                                                                                                                                                                                                                                                                                                                                                                                                                                                                                                                                                                                                                                                                                                                                                                                                                                                                                                                                                                                                                                                                                                                                                                                                                                                                                                                                                                                                                                                                                                                                                                                                                    |
| <p>C,0,0.4084622717,2.8327604111,-0.3991264586<br/>                     N,0,1.123503184,1.8032173023,0.34952821<br/>                     C,0,-1.2891807331,1.1564971814,-0.0011676326<br/>                     C,0,0.2276871611,0.9846573884,1.1474617805<br/>                     C,0,-2.6660896795,0.6852890827,0.3108639897<br/>                     C,0,-1.9516373266,3.2559463525,-1.3083764225<br/>                     C,0,0.8712729777,-0.2601204331,1.6817237558<br/>                     C,0,2.155803345,-0.5941733114,1.3733755485<br/>                     Br,0,-0.8516797179,-2.3254711127,-1.2869536327<br/>                     Cu,0,-0.3881858076,-0.5855142658,0.0272246195<br/>                     C,0,2.9141703683,0.2458015042,0.4926487374<br/>                     C,0,-1.0111559493,2.3325769487,-0.5947186263<br/>                     C,0,2.3647814554,1.3983384562,0.0014351904<br/>                     H,0,-0.2538464994,1.5363770327,1.9569728598<br/>                     O,0,-3.6940927664,0.9836134417,-0.2562550125<br/>                     O,0,-2.6142966259,-0.1598814973,1.3758326189<br/>                     H,0,0.3458762893,-0.7773446167,2.4789717768<br/>                     C,0,-3.8655754384,-0.7787154788,1.7402892408<br/>                     H,0,2.6391412567,-1.4582134013,1.8130465112<br/>                     H,0,0.9322799887,3.0488115368,-1.3372769481<br/>                     N,0,4.2667334117,-0.0900602029,0.1312665539<br/>                     H,0,2.9252596865,2.0355736482,-0.6719603934<br/>                     H,0,-4.2304087811,-1.3924406136,0.9137885851<br/>                     H,0,-4.6077356615,-0.0162704882,1.9872040748<br/>                     H,0,-3.6397892199,-1.3969319081,2.6085517071<br/>                     H,0,-1.8427167962,4.2842351913,-0.937208303<br/>                     H,0,-2.9864321114,2.9317964704,-1.2030686203<br/>                     H,0,-1.7095920953,3.2782998538,-2.3800493665<br/>                     O,0,4.8844130863,0.6866118197,-0.6082447336<br/>                     O,0,4.7299391129,-1.137848049,0.5908090294<br/>                     H,0,0.3635531549,3.7722959191,0.1757381111</p> | <p>C,0,2.2254688803,-2.4626422987,-0.9249516477<br/>                     N,0,2.2163198417,-0.9976482508,-1.0087816452<br/>                     C,0,0.0287357278,-1.7592243778,-1.3248566682<br/>                     C,0,0.976548484,-0.6100095917,-1.727546084<br/>                     C,0,-1.4476040448,-1.7209423769,-1.4009771241<br/>                     C,0,0.3024304831,-4.1909383182,-0.5124972903<br/>                     C,0,0.5556989975,0.8236269023,-1.4747664874<br/>                     C,0,1.1390163926,1.5816420526,-0.4546933583<br/>                     Br,0,-2.0387129784,1.1914936551,1.7645860884<br/>                     Cu,0,-0.6770898648,0.9124724698,0.0159103764<br/>                     C,0,2.2562655051,1.0099525977,0.2812209347<br/>                     C,0,0.7477545811,-2.8258978027,-0.9226760715<br/>                     C,0,2.7160664272,-0.2416414503,-0.0008651249<br/>                     H,0,1.1762565619,-0.716751918,-2.8062730173<br/>                     O,0,-2.182970219,-2.6688819345,-1.5615620889<br/>                     O,0,-1.9248894974,-0.4478310438,-1.2237704163<br/>                     H,0,0.0791789919,1.3318661152,-2.3098821037<br/>                     C,0,-3.3721821247,-0.3137409741,-1.2268387173<br/>                     H,0,1.0685017832,2.6646075775,-0.4680301088<br/>                     H,0,2.7553353856,-2.8027464074,-0.0299138379<br/>                     N,0,2.8968828551,1.7652878066,1.3207853531<br/>                     H,0,3.5344571317,-0.6623951318,0.5726226207<br/>                     H,0,-3.7913844258,-0.8419074504,-0.3704554132<br/>                     H,0,-3.7684093132,-0.7194578126,-2.1586545037<br/>                     H,0,-3.5569278673,0.7548023398,-1.1400138048<br/>                     H,0,0.735582353,-4.9445998776,-1.1845749127<br/>                     H,0,-0.7823668549,-4.2883284727,-0.5448396511<br/>                     H,0,0.6634844574,-4.4252442246,0.4972886399<br/>                     O,0,3.8709277488,1.2662698072,1.900943051<br/>                     O,0,2.4354369053,2.8846337578,1.5687354828<br/>                     H,0,2.7271978851,-2.9019320468,-1.8012962676</p> |
| <p><math>\nu_i = -224.2095 \text{ cm}^{-1}</math><br/>                     G = -5048.535006</p>                                                                                                                                                                                                                                                                                                                                                                                                                                                                                                                                                                                                                                                                                                                                                                                                                                                                                                                                                                                                                                                                                                                                                                                                                                                                                                                                                                                                                                                                                                                                                                                                                                                                                                                                                                                                                                                                                                                                                                                                                                                                                                                | <p>G = -5048.572842</p>                                                                                                                                                                                                                                                                                                                                                                                                                                                                                                                                                                                                                                                                                                                                                                                                                                                                                                                                                                                                                                                                                                                                                                                                                                                                                                                                                                                                                                                                                                                                                                                                                                                                                                                                                                                                                                                                                                                                                                                                                                                                                                                                                                                                    |

**VII.- Cartesian coordinates and Gibbs free energies of the stationary points for conjugate addition of 3-methoxycarbonylpyridine (1d) and 3-fluoropyridine (1e) to carbene intermediate VII, intramolecular cyclization and reductive elimination steps.**

*Stationary points located at Becke3LYP/6-31G(d) level of theory for the reductive elimination step on the reaction of 1d and 1e:*

| <i>TS8_d-ortho</i>                            | <i>TS8_d-para</i>                             |
|-----------------------------------------------|-----------------------------------------------|
| C,0,3.3223056964,0.1961911533,-0.2737512518   | C,0,2.0286977751,-1.9119185644,-1.0731617348  |
| N,0,2.3314270742,1.2530942104,-0.0942996756   | N,0,1.9946449664,-0.4529404248,-1.0110966553  |
| C,0,1.2413809122,-1.0451539859,-0.4283394616  | C,0,-0.3510505532,-1.4549168447,-1.1932430722 |
| C,0,1.1333248671,0.9144163832,-0.8033099092   | C,0,0.8349726605,0.0453400213,-1.7032653224   |
| C,0,0.3597581654,-2.1374195423,-0.9146748563  | C,0,-1.7434691103,-1.7018136823,-1.6427989403 |
| C,0,3.4427948854,-2.3515139244,-0.5362784843  | C,0,0.4092430174,-3.9002516835,-1.1450839601  |
| C,0,-0.0394674421,1.7567374452,-0.5062063198  | C,0,0.5289490457,1.4673256622,-1.4740371243   |
| C,0,-0.1477716877,2.2813395849,0.7718653781   | C,0,0.9272707748,2.0527540782,-0.2984843148   |
| Br,0,-1.3249528123,-0.9487615145,2.2775998464 | Br,0,-2.0798120096,0.2508895043,1.4809260156  |
| Cu,0,-0.1841972926,0.0020822283,0.5690229863  | Cu,0,-0.6466204428,0.3117084375,-0.2584138952 |
| C,0,1.0136911909,2.3113576856,1.622055699     | C,0,1.9218020415,1.3934374225,0.5293042254    |
| C,0,2.5806811618,-1.1345708533,-0.3690988308  | C,0,0.5876894397,-2.4113551452,-1.0934909296  |
| C,0,2.1913751287,1.8109890085,1.1625889475    | C,0,2.4006620034,0.1762838973,0.1397313516    |
| H,0,1.2771843962,0.7738567037,-1.86914896     | H,0,0.8148661926,-0.2309029034,-2.7541049947  |
| O,0,0.5911638339,-3.3274558112,-0.9534825249  | O,0,-2.3765330529,-2.7341739074,-1.5879794217 |
| O,0,-0.8128546367,-1.592482356,-1.3404397282  | O,0,-2.245166765,-0.5492342293,-2.1717217085  |
| C,0,-1.0411206645,1.9422698171,-1.5853300104  | H,0,-0.0816840734,1.9911685068,-2.2024932678  |
| C,0,-1.8303671804,-2.5243704132,-1.7495495613 | C,0,-3.6321098713,-0.5955472662,-2.5579198707 |
| H,0,-1.0451027412,2.8145060269,1.0628601149   | H,0,0.6616709288,3.0741445259,-0.0511658918   |
| H,0,4.0611691813,0.2279706066,0.5337218172    | H,0,2.619964782,-2.3116783826,-0.2428737441   |
| H,0,0.9589753305,2.7537612084,2.6085005139    | C,0,2.411437926,2.0909430743,1.7331264526     |
| H,0,3.1046946181,1.8651920299,1.745274739     | H,0,3.1665076504,-0.3363186482,0.7090716835   |
| H,0,-2.1634774347,-3.1085244822,-0.8882323346 | H,0,-4.2551973252,-0.7900460521,-1.6820456093 |
| H,0,-1.4454167324,-3.1925799019,-2.5229372658 | H,0,-3.7941248272,-1.3772803837,-3.3037973105 |
| H,0,-2.6441789382,-1.9117000047,-2.1363703074 | H,0,-3.8505631429,0.3879712502,-2.9736223114  |
| H,0,4.2388792212,-2.1661201575,-1.2709082823  | H,0,1.1053723115,-4.352505143,-1.8652429103   |
| H,0,2.8561596476,-3.218452606,-0.8385387354   | H,0,-0.6146963833,-4.1710847352,-1.4011652054 |
| H,0,3.9397182686,-2.5902337878,0.4144810116   | H,0,0.6408243903,-4.3373705591,-0.1637006765  |
| H,0,3.8664204673,0.348027883,-1.2187384394    | H,0,2.5130007535,-2.2399941457,-2.0064224023  |
| O,0,-0.8835377545,1.5545801697,-2.727322406   | O,0,2.0417764816,3.1986738275,2.071448026     |
| O,0,-2.1317360736,2.610623907,-1.1586388847   | O,0,3.3239160356,1.3640318809,2.4238867527    |
| C,0,-3.1453291488,2.8348509185,-2.1529779123  | C,0,3.8192638356,1.9867968422,3.6198982237    |
| H,0,-3.5132296154,1.8829177555,-2.5440374186  | H,0,3.0001160596,2.1824106918,4.3164415053    |
| H,0,-2.7466287073,3.4310051349,-2.9779122669  | H,0,4.319282743,2.9299022447,3.3838861372     |
| H,0,-3.9419048248,3.372115567,-1.6384698943   | H,0,4.5254628479,1.2746419245,4.0479849057    |
| $\nu_i = -213.3 \text{ cm}^{-1}$              | $\nu_i = -224.6 \text{ cm}^{-1}$              |
| G = -5071.875706                              | G = -5071.877534                              |

| <i>TS8_e-ortho</i>                            | <i>TS8_e-para</i>                             |
|-----------------------------------------------|-----------------------------------------------|
| C,0,2.545749422,-1.6880078415,-0.5856824945   | C,0,2.4304946775,-1.6835519846,-0.767684769   |
| N,0,2.5474439776,-0.2260299628,-0.5885516981  | N,0,2.4455250337,-0.2208574604,-0.7841985551  |
| C,0,0.1633147002,-1.2114170289,-0.5809466755  | C,0,0.0488357853,-1.2009377715,-0.7766541856  |
| C,0,1.3568327344,0.2396550368,-1.2318812315   | C,0,1.2760381299,0.2551088643,-1.4458658012   |
| C,0,-1.2539199943,-1.4660616238,-0.9453924418 | C,0,-1.3677948709,-1.4532252258,-1.1330972433 |
| C,0,0.9060057688,-3.6579153073,-0.4653704783  | C,0,0.7861794644,-3.6474648531,-0.6286887904  |
| C,0,1.0734530079,1.6625051548,-1.0315779094   | C,0,0.9318018115,1.6638823777,-1.2511690522   |
| C,0,1.4286054631,2.2884132596,0.1315418005    | C,0,1.2624562268,2.262127807,-0.0493040674    |
| Br,0,-1.533409965,0.7217499375,2.0297134208   | Br,0,-1.6044693788,0.6706080361,1.8629182339  |
| Cu,0,-0.0602001622,0.5829955093,0.320066472   | Cu,0,-0.1917176206,0.6302833398,0.0958319769  |
| C,0,2.4029598991,1.6112521625,0.9750553369    | C,0,2.2513870481,1.5988798817,0.770932587     |
| C,0,1.100622071,-2.1702862552,-0.4924278381   | C,0,0.9820472848,-2.1601050627,-0.672898279   |
| C,0,2.9112213064,0.4156279352,0.6000699844    | C,0,2.7939586759,0.415896084,0.4166915409     |
| H,0,1.2654989958,-0.0545750415,-2.2739243513  | H,0,1.1955524828,-0.081895293,-2.4744992446   |
| O,0,-1.8883608447,-2.4891026224,-0.796519955  | O,0,-2.0129334234,-2.4689826764,-0.985118491  |
| O,0,-1.7708922561,-0.3431184813,-1.5114019373 | O,0,-1.8832511,-0.3225995053,-1.699917334     |
| F,0,0.3404417327,2.2690405932,-1.9843238113   | H,0,0.3217483625,2.1638155401,-1.9958887602   |
| C,0,-3.1771145118,-0.3882545526,-1.8171554453 | C,0,-3.293607728,-0.3607301653,-1.9878652971  |
| H,0,1.1540953093,3.3210374559,0.3116649661    | H,0,0.9867865396,3.2834696508,0.1857028373    |
| H,0,3.1846070607,-2.0654731988,0.2193704551   | H,0,3.0672375335,-2.0594945021,0.0396780405   |
| H,0,2.7348114625,2.0796537475,1.8928474402    | F,0,2.6461435671,2.2189545893,1.8973844891    |
| H,0,3.6780132324,-0.0914035578,1.1740161203   | H,0,3.5726081744,-0.0512157286,1.0063755837   |
| H,0,-3.7515369859,-0.512819761,-0.896257682   | H,0,-3.8572793328,-0.4606737354,-1.0573240691 |
| H,0,-3.3930254303,-1.2138092247,-2.4994871203 | H,0,-3.5260983784,-1.1976505631,-2.6504002505 |
| H,0,-3.4022457507,0.5704466236,-2.2836549382  | H,0,-3.5177510388,0.5901869534,-2.4712874432  |
| H,0,1.5575122972,-4.1506746962,-1.2003658487  | H,0,1.4423248985,-4.1508028759,-1.3523933581  |
| H,0,-0.1331311092,-3.9287957813,-0.6503043734 | H,0,-0.2519939292,-3.919671044,-0.8179666479  |
| H,0,1.1890619154,-4.0507519533,0.5212518566   | H,0,1.0610546197,-4.0278204009,0.3650697362   |
| H,0,2.9630546502,-2.0654046029,-1.5322982565  | H,0,2.8467791403,-2.0689574558,-1.7114957139  |
| $\nu_i = -218.2 \text{ cm}^{-1}$              | $\nu_i = -223.1 \text{ cm}^{-1}$              |
| G = -4943.268232                              | G = -4943.266029                              |
